# Supplementary material for: Silver-mediated oxidative C–C bond sulfonylation/arylation of methylenecyclopropanes with sodium sulfinates: facile access to 3-sulfonyl-1,2-dihydronaphthalenes
Source: Royal Society of Chemistry journal article supplement (doi:10.1039/c8ob03045f), 2018-12-27

# Supporting Information

## Silver-Mediated Oxidative C–C Bond Sulfonylation/Arylation of Methylenecyclopropanes with Sodium Sulfinates: Facile Access to 3-Sulfonyl-1,2- Dihydronaphthalenes

Yu Liu,\* Qiao-Lin Wang, Zan Chen, Quan Zhou, Cong-Shan Zhou, Bi-Quan Xiong,  
Pan-Liang Zhang, Chang-An Yang, Ke-Wen Tang\*

Department of Chemistry and Chemical Engineering, Hunan Institute of Science and  
Technology, Yueyang 414006, P. R. China

Fax: (+86)-730-8640-122; phone: (+86)-730-8640-122; email: lyxtmj\_613@163.com,

### List of Contents

|                                                                                                                                                            |                   |
|------------------------------------------------------------------------------------------------------------------------------------------------------------|-------------------|
| <b>1. General Information</b>                                                                                                                              | <b>S1</b>         |
| <b>2. Experimental Section</b>                                                                                                                             | <b>S1</b>         |
| <b>2.1 General procedure for the synthesis of methylenecyclopropanes (1):</b>                                                                              | <b>S1</b>         |
| <b>2.2 Typical Experimental Procedure for the Silver-Mediated synthesis of 3-<br/>    Sulfonyl-1,2-Dihydronaphthalenes from MCPs and Sodium Sulfinates</b> | <b>S1-<br/>S2</b> |
| <b>2.3 Table S1: Screening the optimal conditions</b>                                                                                                      | <b>S2-S3</b>      |
| <b>3. Analytical data</b>                                                                                                                                  | <b>S3-S12</b>     |
| <b>4. Reference</b>                                                                                                                                        | <b>S12</b>        |
| <b>5. <sup>1</sup>H and <sup>13</sup>C spectra</b>                                                                                                         | <b>S13-S47</b>    |

## 1. General Information

All reactions were carried out with magnetic stirring and in dried glassware. Standard syringe techniques were applied for transfer of dry solvents. All reagents and solvents were commercially available and used without any further purification unless specified. Proton ( $^1\text{H}$  NMR) and carbon ( $^{13}\text{C}$  NMR) nuclear magnetic resonance spectra were recorded at 400 MHz and 100MHz, respectively. The chemical shifts are given in parts per million (ppm) on the delta ( $\delta$ ) scale. The solvent peak was used as a reference value, for  $^1\text{H}$  NMR: TMS = 0.00 ppm, for  $^{13}\text{C}$  NMR:  $\text{CDCl}_3$  = 77.00 ppm. The following abbreviations were used to explain multiplicities: s = singlet, d = doublet, dd = doublet of doublet, t = triplet, td = triplet of doublet, q = quartet, m = multiplet, and br = broad. Analytical TLC was performed on precoated silica gel plates. High-resolution mass spectra (HRMS) were obtained on an Agilent mass spectrometer using ESI-TOF (electrospray ionization-time of flight).

## 2. Experiment Section

### 2.1 General procedure for the synthesis of methylcyclopropanes (1):

All methylcyclopropanes (MCPs) (**1**) were synthesized according to the known methods<sup>[1-3]</sup>.

### 2.2 Typical Experimental Procedure for the Silver-Mediated synthesis of 3-Sulfonyl-1,2-Dihydronaphthalenes from MCPs and Sodium Sulfinates.

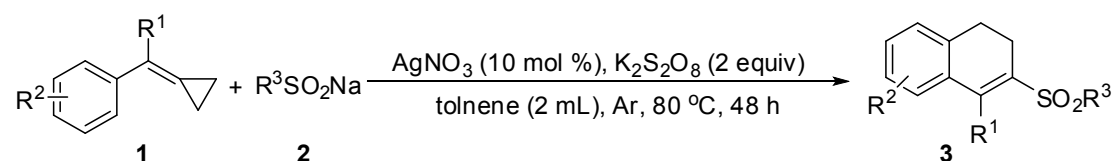

To a Schlenk tube were added **1** (0.2 mmol), **2** (1.5 equiv, 0.3 mmol), AgNO<sub>3</sub> (10 mol %), K<sub>2</sub>S<sub>2</sub>O<sub>8</sub> (2 equiv, 0.4 mmol), and toluene (2 mL). Then the mixture was stirred at 80 °C (oil bath temperature) in argon atmosphere (1 atm) for 36 h until complete consumption of starting material as monitored by TLC and GC-MS analysis. After the reaction was finished, the reaction mixture was washed with brine. The aqueous phase was re-extracted with EtOAc (3×10 mL). The combined organic extracts were dried over Na<sub>2</sub>SO<sub>4</sub> and concentrated in vacuum. The residue was

purified by silica gel flash column chromatography (hexane/ethyl acetate = 20 : 1 to 10 : 1) to afford the desired products **3**.

### 2.3 Table S1: Screening the optimal conditions

Initially, we set out to investigate the difunctionalization of 1-(benzyloxy)-2-(cyclopropylidene-methyl)-benzene (**1a**) with sodium *p*-tolylsulfinate (**2a**) to identify the optimal reaction conditions. As shown in Table 1, we found that treatment of substrate **1a** with sodium sulfinate **2a**, AgNO<sub>3</sub> (10 mol%) and K<sub>2</sub>S<sub>2</sub>O<sub>8</sub> (1.5 equiv) in toluene at 80 °C under argon atmosphere for 36 hour produced the target product, 5-(benzyloxy)-3-tosyl-1,2-dihydronaphthalene **3aa**, in 88% yield (entry 1). Next, a range of silver catalysts, such as Ag<sub>2</sub>CO<sub>3</sub>, Ag<sub>2</sub>SO<sub>4</sub>, AgF, AgSCN and AgIO<sub>3</sub>, were tested (entries 2–6). Although the reactions in presence of these silver salts could take place smoothly, none of them was superior to AgNO<sub>3</sub>. We noted that the desired product **3aa** could also be obtained in 35% yield absence of silver salt (entry 7). Reducing the amount of AgNO<sub>3</sub> to 5 mol % afforded the product **3aa** in 71% yield (entry 8). A series of oxidants, including DDQ (2,3-dicyano-5,6-dichlorobenzoquinone), (NH<sub>4</sub>)<sub>2</sub>S<sub>2</sub>O<sub>8</sub>, PhI(OAc)<sub>2</sub> ((diacetoxyiodo)benzene), BQ (benzoquinone), DTBP (di-*tert*-butyl peroxide), and TBHP (*tert*-butyl hydroperoxide), were examined, and no obvious improvement of the reaction yields was obtained (entries 9–14). The results showed that the K<sub>2</sub>S<sub>2</sub>O<sub>8</sub> was important for the ring-opening/cyclization, the absence of K<sub>2</sub>S<sub>2</sub>O<sub>8</sub> led to no detectable amounts of 2-sulfonylated 3,4-dihydronaphthalene **3aa** (entry 15). Several solvents were also surveyed, suggesting that toluene is the best suited solvent according to the reaction yields, as other solvents such as benzene, dioxane, <sup>n</sup>BuOAc, DMF, and DMSO could not improve the reaction yield (entries 16–20). A moderate yield was afforded by using dioxane in the reaction system (entry 17). The variation of the reaction temperatures indicated that 80 °C was best suited temperatures (entries 21–22). A lower temperature led to the MCPs unactive and a higher temperature resulted in decomposing of the starting materials. We were delighted to find that conducting the reaction under air atmosphere gave the desired product **3aa** in 84% yield (entry 23). Additionally, no obvious improvement of the yield was afforded when the

difunctionalization reaction was carried out with a longer reaction time (entry 24). To our delighted, a 1 g (3.77 mmol) of substrate **1a** could generate the desired product **3aa** in good yield (entry 25).

**Table S1.** Screening of Optimal Reaction Conditions<sup>a</sup>

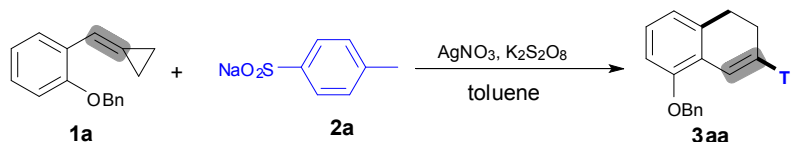

| entry           | catalyst (mol %)                     | oxidant                                                       | solvent            | T (°C) | yield (%) <sup>b</sup> |
|-----------------|--------------------------------------|---------------------------------------------------------------|--------------------|--------|------------------------|
| 1               | AgNO <sub>3</sub> (10)               | K <sub>2</sub> S <sub>2</sub> O <sub>8</sub>                  | toluene            | 80     | 88                     |
| 2               | Ag <sub>2</sub> CO <sub>3</sub> (10) | K <sub>2</sub> S <sub>2</sub> O <sub>8</sub>                  | toluene            | 80     | 42                     |
| 3               | Ag <sub>2</sub> SO <sub>4</sub> (10) | K <sub>2</sub> S <sub>2</sub> O <sub>8</sub>                  | toluene            | 80     | 50                     |
| 4 <sup>c</sup>  | AgF (10)                             | K <sub>2</sub> S <sub>2</sub> O <sub>8</sub>                  | toluene            | 80     | 44                     |
| 5 <sup>c</sup>  | AgSCN (10)                           | K <sub>2</sub> S <sub>2</sub> O <sub>8</sub>                  | toluene            | 80     | 38                     |
| 6               | AgIO <sub>3</sub> (10)               | K <sub>2</sub> S <sub>2</sub> O <sub>8</sub>                  | toluene            | 80     | 56                     |
| 7               | —                                    | K <sub>2</sub> S <sub>2</sub> O <sub>8</sub>                  | toluene            | 80     | 35                     |
| 8               | AgNO <sub>3</sub> (5)                | K <sub>2</sub> S <sub>2</sub> O <sub>8</sub>                  | toluene            | 80     | 71                     |
| 9               | AgNO <sub>3</sub> (10)               | DDQ                                                           | toluene            | 80     | 0                      |
| 10 <sup>c</sup> | AgNO <sub>3</sub> (10)               | (NH <sub>4</sub> ) <sub>2</sub> S <sub>2</sub> O <sub>8</sub> | toluene            | 80     | 70                     |
| 11 <sup>c</sup> | AgNO <sub>3</sub> (10)               | PhI(OAc) <sub>2</sub>                                         | toluene            | 80     | 0                      |
| 12 <sup>c</sup> | AgNO <sub>3</sub> (10)               | BQ                                                            | toluene            | 80     | 0                      |
| 13 <sup>c</sup> | AgNO <sub>3</sub> (10)               | DTBP                                                          | toluene            | 80     | 0                      |
| 14              | AgNO <sub>3</sub> (10)               | TBHP                                                          | toluene            | 80     | 13                     |
| 15 <sup>c</sup> | AgNO <sub>3</sub> (10)               | —                                                             | toluene            | 80     | 0                      |
| 16              | AgNO <sub>3</sub> (10)               | K <sub>2</sub> S <sub>2</sub> O <sub>8</sub>                  | bezene             | 80     | 58                     |
| 17              | AgNO <sub>3</sub> (10)               | K <sub>2</sub> S <sub>2</sub> O <sub>8</sub>                  | dioxane            | 80     | 68                     |
| 18              | AgNO <sub>3</sub> (10)               | K <sub>2</sub> S <sub>2</sub> O <sub>8</sub>                  | <sup>n</sup> BuOAc | 80     | 36                     |
| 19              | AgNO <sub>3</sub> (10)               | K <sub>2</sub> S <sub>2</sub> O <sub>8</sub>                  | DMF                | 80     | 40                     |
| 20 <sup>c</sup> | AgNO <sub>3</sub> (10)               | K <sub>2</sub> S <sub>2</sub> O <sub>8</sub>                  | DMSO               | 80     | trace                  |
| 21              | AgNO <sub>3</sub> (10)               | K <sub>2</sub> S <sub>2</sub> O <sub>8</sub>                  | toluene            | 100    | 75                     |
| 22              | AgNO <sub>3</sub> (10)               | K <sub>2</sub> S <sub>2</sub> O <sub>8</sub>                  | toluene            | 60     | 60                     |
| 23 <sup>d</sup> | AgNO <sub>3</sub> (10)               | K <sub>2</sub> S <sub>2</sub> O <sub>8</sub>                  | toluene            | 80     | 84                     |
| 24 <sup>e</sup> | AgNO <sub>3</sub> (10)               | K <sub>2</sub> S <sub>2</sub> O <sub>8</sub>                  | toluene            | 80     | 89                     |
| 25 <sup>f</sup> | AgNO <sub>3</sub> (10)               | K <sub>2</sub> S <sub>2</sub> O <sub>8</sub>                  | toluene            | 80     | 73                     |

<sup>a</sup> Reaction conditions: **1a** (0.2 mmol), **2a** (0.3 mmol, 1.5 equiv), catalyst (10 mol %), oxidant (0.4 mmol, 2 equiv) and solvent (2 mL) at 80 °C under an argon atmosphere for 36 h. <sup>b</sup> Isolated yield. <sup>c</sup> Over 85% of raw material **1a** was recovered, and the rest was decomposed. <sup>d</sup> under air atmosphere. <sup>e</sup> For 48 h. <sup>f</sup> **1a** (1 g, 4.24 mmol) and solvent (10 mL) for 72 h.

### 3. Analytical data

**5-(Benzyloxy)-3-tosyl-1,2-dihydronaphthalene (3aa):** Yield: 68.7 mg, 88%; yellow solid, mp

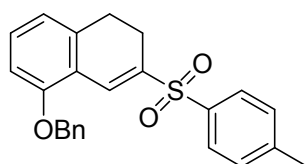

82.5-84.3 °C (uncorrected); <sup>1</sup>H NMR (400 MHz, CDCl<sub>3</sub>) δ: 8.04 (s, 1H), 7.81 (d, *J* = 8.0 Hz, 2H), 7.42-7.40 (m, 4H), 7.36-7.30 (m, 3H), 7.18 (t, *J* = 8.0 Hz, 1H), 6.78 (d, *J* = 8.4 Hz, 1H), 6.72 (d, *J* = 7.6 Hz,

1H), 5.14 (s, 2H), 2.82 (t,  $J = 8.0$  Hz, 2H), 2.47 (t,  $J = 8.0$  Hz, 2H), 2.42 (s, 3H);  $^{13}\text{C}$  NMR (100 MHz,  $\text{CDCl}_3$ )  $\delta$ : 155.9, 140.0, 137.2, 137.0, 136.8, 136.6, 131.1, 129.7, 129.4, 128.7, 128.0, 127.9, 127.1, 120.4, 120.2, 110.7, 70.3, 27.9, 21.6, 21.3; HRMS (ESI-TOF)  $m/z$ :  $\text{C}_{24}\text{H}_{23}\text{O}_3\text{S}$  ( $\text{M} + \text{H}$ ) $^+$  calcd for 391.1362, found 391.1368.

**5-Methoxy-3-tosyl-1,2-dihydronaphthalene (3ba)**: Yield: 50.3 mg, 80%; yellow oil;  $^1\text{H}$  NMR

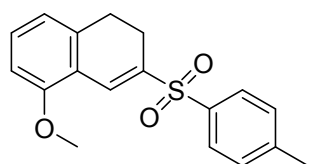

(400 MHz,  $\text{CDCl}_3$ )  $\delta$ : 8.02 (s, 1H), 7.81 (d,  $J = 8.4$  Hz, 2H), 7.31 (d,  $J = 8.0$  Hz, 2H), 7.21 (d,  $J = 8.0$  Hz, 1H), 6.76-6.70 (m, 2H), 3.86 (s, 3H), 2.81 (t,  $J = 8.4$  Hz, 2H), 2.47-2.42 (m, 5H);  $^{13}\text{C}$  NMR (100 MHz,  $\text{CDCl}_3$ )  $\delta$ : 156.8, 144.0, 137.1, 137.0, 136.6, 131.2, 129.7, 129.6, 127.9, 120.0, 119.9, 109.1, 55.5, 27.9, 21.6, 21.4; HRMS (ESI-TOF)  $m/z$ :  $\text{C}_{18}\text{H}_{19}\text{O}_3\text{S}$  ( $\text{M} + \text{H}$ ) $^+$  calcd for 315.1049, found 315.1056.

**6-(Benzyloxy)-3-tosyl-1,2-dihydronaphthalene (3ca) and 8-(benzyloxy)-3-tosyl-1,2-**

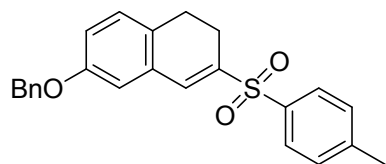

**dihydronaphthalene (3ca')**: Yield: 69.4 mg, 89%; yellow oil;  $^1\text{H}$  NMR (400 MHz,  $\text{CDCl}_3$ )  $\delta$ : 7.80 (d,  $J = 8.0$  Hz, 2H), 7.52 (d,  $J = 12.8$  Hz, 1H), 7.43-7.31 (m, 7H), 7.18 (t,  $J = 8.0$  Hz, 0.6H), 7.03 (d,  $J = 8.8$  Hz, 0.4H), 6.95-6.88 (m, 2H), 5.06 (s, 2H), 2.92 (t,  $J = 8.4$  Hz, 1.2H), 2.78 (t,  $J = 8.0$  Hz, 0.8H), 2.48-2.43 (m, 5H);  $^{13}\text{C}$  NMR (100 MHz,  $\text{CDCl}_3$ )  $\delta$ : 157.7, 155.3, 144.3, 138.6, 136.8, 136.7, 136.5, 134.7, 134.6, 132.1, 131.9, 129.8, 129.8, 128.6, 128.6, 128.0, 128.0, 128.0, 127.8, 127.4, 127.4, 127.1, 123.9, 121.9, 116.6, 115.2, 114.2, 70.2, 29.7, 26.7, 22.1, 21.6, 21.1, 20.3; HRMS (ESI-TOF)  $m/z$ :  $\text{C}_{24}\text{H}_{23}\text{O}_3\text{S}$  ( $\text{M} + \text{H}$ ) $^+$  calcd for 391.1362, found 391.1368.

**6-Methoxy-3-tosyl-1,2-dihydronaphthalene (3da) and 8-methoxy-3-tosyl-1,2-**

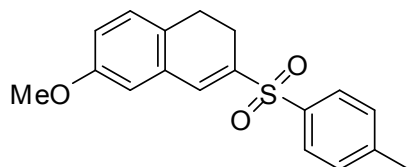

**dihydronaphthalene (3da')**: Yield: 51.5 mg, 82%; white solid, mp 83.1-84.3  $^\circ\text{C}$  (uncorrected);  $^1\text{H}$  NMR (400 MHz,  $\text{CDCl}_3$ )  $\delta$ : 7.80 (d,  $J = 8.4$  Hz, 2H), 7.52 (s, 1H), 7.32 (d,  $J = 8.0$  Hz, 2H), 7.20 (t,  $J = 8.0$  Hz, 0.7H), 7.04 (d,  $J = 9.2$  Hz, 0.3H), 6.89 (t,  $J = 7.2$  Hz, 1.4H), 6.82 (s, 0.6H), 3.81 (s, 2.1H), 3.80 (s, 0.9H), 2.85 (t,  $J = 7.6$  Hz, 1.4H), 2.79 (t,  $J = 8.0$  Hz, 0.6H), 2.49-2.43 (m, 5H);  $^{13}\text{C}$  NMR (100 MHz,  $\text{CDCl}_3$ )  $\delta$ : 157.5, 155.2, 143.3, 138.0, 137.5, 135.5, 133.7, 133.7, 130.9, 128.8, 128.8, 127.6, 127.0, 126.5, 126.4, 122.4, 120.5, 114.7, 113.2, 111.7, 51.5, 54.4, 28.7, 28.3, 26.1, 25.7, 21.1, 20.6; HRMS (ESI-TOF)  $m/z$ :  $\text{C}_{18}\text{H}_{19}\text{O}_3\text{S}$  ( $\text{M} + \text{H}$ ) $^+$  calcd for 315.1049, found 315.1056.

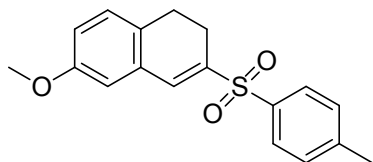

**6-Methoxy-3-tosyl-1,2-dihydronaphthalene (3da):** Yield:

51.5 mg, 82%; white solid, mp 82.0-84.9 °C (uncorrected); <sup>1</sup>H

NMR (400 MHz, CDCl<sub>3</sub>) δ: 7.80 (d, *J* = 8.4 Hz, 2H), 7.53 (s,

1H), 7.32 (d, *J* = 8.0 Hz, 2H), 7.20 (t, *J* = 8.0 Hz, 1H), 6.89 (t, *J* = 7.2 Hz, 2H), 3.81 (s, 3H), 2.85

(t, *J* = 8.4 Hz, 2H), 2.47-2.43 (m, 5H); <sup>13</sup>C NMR (100 MHz, CDCl<sub>3</sub>) δ: 156.2, 144.2, 138.5, 136.5,

134.7, 131.9, 129.8, 128.0, 127.4, 123.4, 121.5, 112.7, 55.5, 21.6, 21.1, 20.0; HRMS (ESI-TOF)

*m/z*: C<sub>18</sub>H<sub>19</sub>O<sub>3</sub>S (M + H)<sup>+</sup> calcd for 315.1049, found 315.1056.

**7-(Benzyloxy)-3-tosyl-1,2-dihydronaphthalene yellow solid (3ea):** Yield: 71.8 mg, 92%; yellow

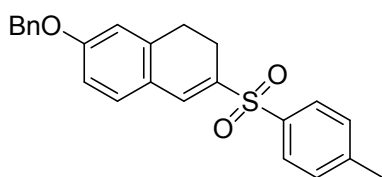

solid, mp 95.7-97.0 °C (uncorrected); <sup>1</sup>H NMR (400 MHz,

CDCl<sub>3</sub>) δ: 7.79 (d, *J* = 8.4 Hz, 2H), 7.54-7.52 (m, 1H), 7.42-

7.36 (m, 4H), 7.35-7.32 (m, 3H), 7.19 (d, *J* = 8.0 Hz, 1H),

5.07 (s, 2H), 2.82 (t, *J* = 8.0 Hz, 2H), 2.45 (t, *J* = 8.0 Hz, 2H),

2.42 (s, 3H); <sup>13</sup>C NMR (100 MHz, CDCl<sub>3</sub>) δ: 160.5, 144.1, 137.6, 136.9, 136.4, 135.4, 134.6,

130.5, 129.8, 128.6, 128.1, 127.9, 127.4, 124.3, 114.8, 112.7, 70.0, 28.0, 21.6, 21.5; HRMS (ESI-

TOF) *m/z*: C<sub>24</sub>H<sub>23</sub>O<sub>3</sub>S (M + H)<sup>+</sup> calcd for 391.1362, found 391.1368.

**7-Methoxy-3-tosyl-1,2-dihydronaphthalene (3fa):** Yield: 54.0 mg, 86%; yellow solid, mp

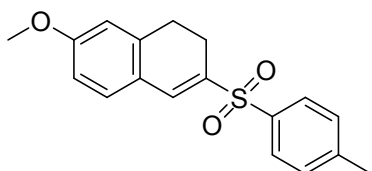

102.1-103.5 °C (uncorrected); <sup>1</sup>H NMR (400 MHz, CDCl<sub>3</sub>) δ:

7.79 (d, *J* = 6.4 Hz, 2H), 7.53 (s, 1H), 7.32 (d, *J* = 8.0 Hz, 2H),

7.20 (d, *J* = 8.4 Hz, 1H), 6.76-6.73 (m, 1H), 6.70 (s, 1H), 3.81

(s, 3H), 2.83 (t, *J* = 8.4 Hz, 2H), 2.48-2.44 (m, 2H), 2.43 (s,

3H); <sup>13</sup>C NMR (100 MHz, CDCl<sub>3</sub>) δ: 161.3, 144.0, 137.6, 136.9, 135.2, 134.7, 130.5, 129.8, 127.8,

124.1, 114.0, 111.8, 55.3, 21.1, 21.6, 21.5; HRMS (ESI-TOF) *m/z*: C<sub>18</sub>H<sub>19</sub>O<sub>3</sub>S (M + H)<sup>+</sup> calcd for

315.1049, found 315.1056.

**7-Methyl-3-tosyl-1,2-dihydronaphthalene (3ga):** Yield: 48.3 mg, 81%; white solid, mp 108.7-

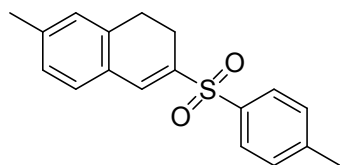

109.9 °C (uncorrected); <sup>1</sup>H NMR (400 MHz, CDCl<sub>3</sub>) δ: 7.83-

7.78 (m, 3H), 7.37-7.32 (m, 2H), 7.16 (t, *J* = 7.6 Hz, 1H), 7.06 (d,

*J* = 7.2 Hz, 1H), 6.96 (d, *J* = 7.2 Hz, 1H), 2.81 (t, *J* = 8.0 Hz, 2H),

2.46-2.44 (m, 8H); <sup>13</sup>C NMR (100 MHz, CDCl<sub>3</sub>) δ: 144.2, 138.3, 136.7, 136.5, 135.9, 131.6, 130.0,

129.8, 129.4, 128.9, 127.9, 125.5, 28.3, 21.6, 21.4, 19.0; HRMS (ESI-TOF) *m/z*: C<sub>18</sub>H<sub>19</sub>O<sub>2</sub>S (M +

H)<sup>+</sup> calcd for 299.1100, found 299.1107.

**7-Phenyl-3-tosyl-1,2-dihydronaphthalene (3ha):** Yield: 62.7 mg, 87%; yellow oil; <sup>1</sup>H NMR

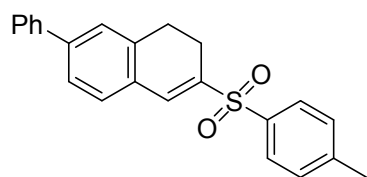

(400 MHz, CDCl<sub>3</sub>) δ: 7.83 (s, 2H), 7.61 (s, 1H), 7.57 (s, 2H), 7.46-7.42 (m, 3H), 7.37-7.26 (m, 5H), 2.93 (t, *J* = 8.4 Hz, 2H), 2.53 (t, *J* = 8.4 Hz, 2H), 2.43 (s, 3H); <sup>13</sup>C NMR (100 MHz,

CDCl<sub>3</sub>) δ: 144.3, 143.2, 140.2, 138.2, 136.6, 136.0, 134.4, 130.1, 129.8, 129.4, 128.8, 128.0, 127.8, 127.0, 126.5, 125.8, 27.8, 21.8, 21.6; HRMS (ESI-TOF) *m/z*: C<sub>23</sub>H<sub>21</sub>O<sub>2</sub>S (M + H)<sup>+</sup> calcd for 361.1257, found 361.1266

**7-Chloro-3-tosyl-1,2-dihydronaphthalene (3ia):** Yield: 49.0 mg, 77%; white solid, mp 64.6-66.1

°C (uncorrected); <sup>1</sup>H NMR (400 MHz, CDCl<sub>3</sub>) δ: 7.80 (d, *J* = 8.0 Hz, 2H), 7.52 (s, 1H), 7.34 (d, *J*

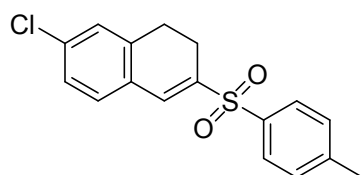

= 8.0 Hz, 2H), 7.22-7.17 (m, 2H), 7.12 (s, 1H), 2.84 (t, *J* = 8.0 Hz, 2H), 2.48 (t, *J* = 8.4 Hz, 2H), 2.43 (s, 3H); <sup>13</sup>C NMR (100 MHz, CDCl<sub>3</sub>) δ: 144.4, 138.8, 137.2, 136.3, 135.9, 133.5, 129.9, 129.9, 129.5, 128.0, 127.9, 127.2, 27.4, 21.6, 21.4;

HRMS (ESI-TOF) *m/z*: C<sub>17</sub>H<sub>16</sub><sup>35</sup>ClO<sub>2</sub>S (M + H)<sup>+</sup> calcd for 319.0554, found 319.0562.

**3-Tosyl-7-(trifluoromethyl)-1,2-dihydronaphthalene (3ja):** Yield: 51.4 mg, 73%; white solid,

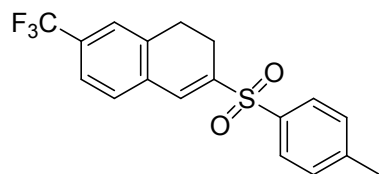

mp 74.1-76.0 °C (uncorrected); <sup>1</sup>H NMR (400 MHz, CDCl<sub>3</sub>) δ: 7.81 (d, *J* = 8.4 Hz, 2H), 7.57 (s, 1H), 7.49 (d, *J* = 8.0 Hz, 1H), 7.37-7.32 (m, 4H), 2.92 (t, *J* = 8.0 Hz, 2H), 2.53 (t, *J* = 8.0 Hz, 2H), 2.44 (s, 3H); <sup>13</sup>C NMR (100 MHz, CDCl<sub>3</sub>) δ: 144.7,

141.3, 136.1, 136.0, 134.2, 133.0, 130.0, 129.9, 129.0, 128.1, 128.0, 124.5, 124.5, 124.1, 124.1, 122.4, 27.4, 21.6, 21.5; <sup>19</sup>F NMR (282 MHz, CDCl<sub>3</sub>) δ: -62.9 (s, 3F); HRMS (ESI-TOF) *m/z*: C<sub>18</sub>H<sub>16</sub><sup>19</sup>F<sub>3</sub>O<sub>2</sub>S (M + H)<sup>+</sup> calcd for 353.0818, found 353.0824.

**5,7-Dimethoxy-3-tosyl-1,2-dihydronaphthalene (3ka):** Yield: 46.8 mg, 68%; yellow oil; <sup>1</sup>H

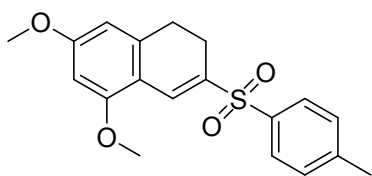

NMR (400 MHz, CDCl<sub>3</sub>) δ: 7.93 (s, 1H), 7.79 (d, *J* = 8.4 Hz, 2H), 7.29 (t, *J* = 8.8 Hz, 2H), 6.28 (t, *J* = 8.4 Hz, 2H), 3.83 (s, 3H), 3.80 (s, 3H), 2.78 (t, *J* = 8.0 Hz, 2H), 2.44-2.40 (m, 5H); <sup>13</sup>C NMR (100 MHz, CDCl<sub>3</sub>) δ: 162.5, 158.3, 143.7, 138.7,

137.3, 133.2, 129.9, 129.7, 127.8, 113.5, 104.9, 96.3, 55.5, 55.4, 28.6, 21.6, 21.4; HRMS (ESI-TOF) *m/z*: C<sub>19</sub>H<sub>21</sub>O<sub>4</sub>S (M + H)<sup>+</sup> calcd for 345.1155, found 345.1160.

**6,7-Dimethoxy-3-tosyl-1,2-dihydronaphthalene (3la):** Yield: 48.9 mg, 71%; yellow oil; <sup>1</sup>H

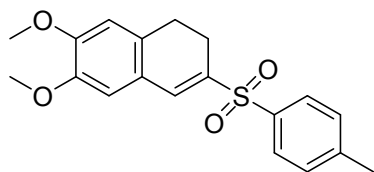

NMR (400 MHz, CDCl<sub>3</sub>) δ: 7.80 (d, *J* = 8.4 Hz, 2H), 7.50 (s, 1H), 7.32 (d, *J* = 8.0 Hz, 2H), 6.79 (s, 1H), 6.66 (s, 1H), 3.88 (s, 6H), 2.80 (t, *J* = 8.0 Hz, 2H), 2.46 (t, *J* = 8.4 Hz, 2H), 2.43 (s, 3H); <sup>13</sup>C NMR (100 MHz, CDCl<sub>3</sub>) δ: 150.5, 147.7, 144.1, 136.9, 135.7, 134.8, 129.8, 128.9, 127.9, 123.5, 112.0, 111.0, 56.1, 56.0, 27.4, 21.7, 21.6; HRMS (ESI-TOF) *m/z*: C<sub>19</sub>H<sub>21</sub>O<sub>4</sub>S (M + H)<sup>+</sup> calcd for 345.1155, found 345.1160.

**5-Bromo-7-tosyl-8,9-dihydronaphtho[1,2-d][1,3]dioxole (3ma):** Yield: 37.4 mg, 46%; yellow

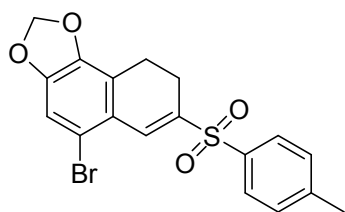

oil; <sup>1</sup>H NMR (400 MHz, CDCl<sub>3</sub>) δ: 7.85 (t, *J* = 7.2 Hz, 2H), 7.37 (d, *J* = 8.0 Hz, 2H), 7.08 (s, 1H), 6.79 (s, 1H), 6.04 (s, 2H), 3.57 (t, *J* = 8.0 Hz, 2H), 2.77 (t, *J* = 8.0 Hz, 2H), 2.46 (s, 3H); <sup>13</sup>C NMR (100 MHz, CDCl<sub>3</sub>) δ: 149.3, 147.6, 144.8, 140.8, 139.7, 135.8, 130.0, 128.3, 126.3, 115.6, 113.2, 108.5, 102.3, 41.3, 30.2, 21.7; HRMS (ESI-TOF) *m/z*: C<sub>18</sub>H<sub>16</sub><sup>80</sup>BrO<sub>4</sub>S (M + H)<sup>+</sup> calcd for 406.9947, found 406.9956.

**3-Tosyl-1,2-dihydronaphthalene (3na):** Yield: 42.0 mg, 74%; white solid, mp 80.4-81.7 °C

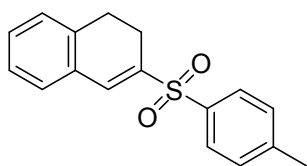

(uncorrected); <sup>1</sup>H NMR (400 MHz, CDCl<sub>3</sub>) δ: 7.80 (d, *J* = 8.4 Hz, 2H), 7.57 (s, 1H), 7.33 (d, *J* = 8.4 Hz, 2H), 7.30-7.23 (m, 3H), 7.13 (d, *J* = 6.8 Hz, 1H), 2.86 (t, *J* = 8.0 Hz, 2H), 2.49 (t, *J* = 8.0 Hz, 2H), 2.43 (s, 3H); <sup>13</sup>C NMR (100 MHz, CDCl<sub>3</sub>) δ: 144.3, 138.4, 136.5, 135.5, 134.7, 131.0, 130.4, 129.8, 129.0, 128.0, 127.7, 127.1, 27.5, 21.7, 21.6; HRMS (ESI-TOF) *m/z*: C<sub>17</sub>H<sub>17</sub>O<sub>2</sub>S (M + H)<sup>+</sup> calcd for 285.0944, found 285.0952.

**5-(Benzyloxy)-3-((4-(tert-butyl)phenyl)sulfonyl)-1,2-dihydronaphthalene (3ab):** Yield: 76.9

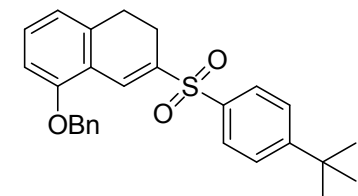

mg, 89%; yellow soli, mp 113.8-115.1 °C (uncorrected); <sup>1</sup>H NMR (400 MHz, CDCl<sub>3</sub>) δ: 8.08 (s, 1H), 7.84 (d, *J* = 8.8 Hz, 2H), 7.51 (d, *J* = 8.8 Hz, 2H), 7.44-7.38 (m, 4H), 7.35-7.33 (m, 1H), 7.17 (t, *J* = 8.0 Hz, 1H), 6.78 (d, *J* = 8.4 Hz, 1H), 6.71 (d, *J* = 7.6 Hz, 1H), 5.14 (s, 2H), 2.83 (t, *J* = 8.0 Hz, 2H), 2.48 (t, *J* = 8.0 Hz, 2H), 1.32 (s, 9H); <sup>13</sup>C NMR (100 MHz, CDCl<sub>3</sub>) δ: 156.9, 155.8, 137.2, 136.9, 136.8, 136.6, 131.1, 129.5, 128.6, 127.9, 127.7, 127.1, 126.1, 120.4, 120.2, 110.7, 70.2, 35.1, 31.0, 27.9, 21.4; HRMS (ESI-TOF) *m/z*: C<sub>27</sub>H<sub>29</sub>O<sub>3</sub>S (M + H)<sup>+</sup> calcd for 433.1832, found 433.1837.

**5-(Benzyloxy)-3-((4-methoxyphenyl)sulfonyl)-1,2-dihydronaphthalene (3ac):** Yield: 69.0 mg,



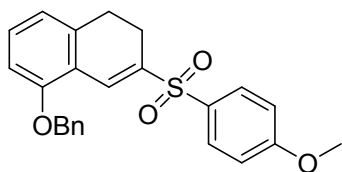

85%; yellow solid, mp 52.1-53.5 °C (uncorrected); <sup>1</sup>H NMR (400 MHz, CDCl<sub>3</sub>) δ: 8.00 (s, 1H), 7.85 (d, *J* = 9.2 Hz, 2H), 7.42-7.38 (m, 4H), 7.36-7.33 (m, 1H), 7.18 (t, *J* = 8.0 Hz, 1H), 6.98 (d, *J* = 8.8 Hz, 2H), 6.78 (d, *J* = 8.4 Hz, 1H), 6.72 (d, *J* = 7.6 Hz, 1H), 5.13 (s, 2H), 3.86 (s, 3H), 2.83 (t, *J* = 8.0 Hz, 2H), 2.47 (t, *J* = 8.4 Hz, 2H); <sup>13</sup>C NMR (100 MHz, CDCl<sub>3</sub>) δ: 163.4, 155.8, 137.4, 137.2, 136.6, 131.2, 131.1, 130.2, 128.9, 128.7, 128.0, 127.1, 120.5, 120.3, 114.3, 110.7, 70.3, 55.6, 28.0, 21.3; HRMS (ESI-TOF) *m/z*: C<sub>24</sub>H<sub>23</sub>O<sub>4</sub>S (M + H)<sup>+</sup> calcd for 407.1312, found 407.1316.

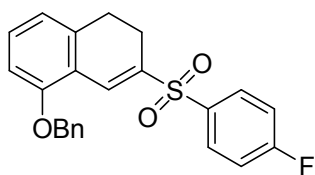

**5-(Benzyloxy)-3-((4-fluorophenyl)sulfonyl)-1,2-dihydronaphthalene (3ad):** Yield: 64.6 mg, 82%; colorless oil; <sup>1</sup>H NMR (400 MHz, CDCl<sub>3</sub>) δ: 8.04 (s, 1H), 7.96-7.92 (m, 2H), 7.42-7.38 (m, 4H), 7.37-7.34 (m, 1H), 7.20 (t, *J* = 7.6 Hz, 3H), 6.79 (d, *J* = 8.4 Hz, 1H), 6.73 (d, *J* = 7.6 Hz, 1H), 5.14 (s, 2H), 2.84 (t, *J* = 8.4 Hz, 2H), 2.47 (t, *J* = 8.0 Hz, 2H); <sup>13</sup>C NMR (100 MHz, CDCl<sub>3</sub>) δ: 166.7, 164.2, 155.9, 137.2, 136.5, 136.5, 131.4, 130.8, 130.7, 130.0, 128.7, 128.0, 127.1, 120.3, 120.2, 116.5, 116.3, 110.7, 70.3, 27.9, 21.3; <sup>19</sup>F NMR (282 MHz, CDCl<sub>3</sub>): δ: -104.3 (s, 1F); HRMS (ESI-TOF) *m/z*: C<sub>23</sub>H<sub>20</sub><sup>19</sup>FO<sub>3</sub>S (M + H)<sup>+</sup> calcd for 395.1112, found 395.1118.

**5-(Benzyloxy)-3-((4-chlorophenyl)sulfonyl)-1,2-dihydronaphthalene (3ae):** Yield: 65.6 mg,

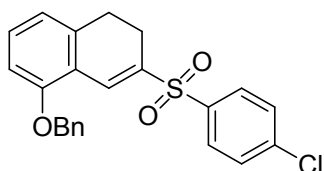

80%; yellow oil; <sup>1</sup>H NMR (400 MHz, CDCl<sub>3</sub>) δ: 8.06 (s, 1H), 7.86 (d, *J* = 8.4 Hz, 2H), 7.49 (d, *J* = 8.4 Hz, 2H), 7.42-7.37 (m, 4H), 7.36-7.34 (m, 1H), 7.20 (t, *J* = 8.0 Hz, 1H), 6.79 (d, *J* = 8.4 Hz, 1H), 6.73 (d, *J* = 7.2 Hz, 1H), 5.14 (s, 2H), 2.84 (t, *J* = 8.4 Hz, 2H), 2.47 (t, *J* = 8.0 Hz, 2H); <sup>13</sup>C NMR (100 MHz, CDCl<sub>3</sub>) δ: 156.0, 139.8, 138.4, 137.2, 136.5, 136.2, 131.5, 130.4, 129.5, 129.4, 128.7, 128.1, 127.1, 120.3, 120.2, 110.8, 70.3, 27.9, 21.3; HRMS (ESI-TOF) *m/z*: C<sub>23</sub>H<sub>20</sub><sup>35</sup>ClO<sub>3</sub>S (M + H)<sup>+</sup> calcd for 411.0816, found 411.0824.

**5-(Benzyloxy)-3-((4-bromophenyl)sulfonyl)-1,2-dihydronaphthalene (3af):** Yield: 69.9 mg,

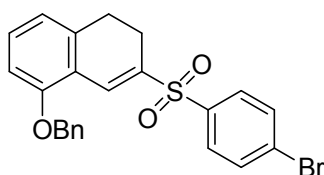

77%; yellow oil; <sup>1</sup>H NMR (400 MHz, CDCl<sub>3</sub>) δ: 8.07 (s, 1H), 7.79 (d, *J* = 7.6 Hz, 2H), 7.66 (d, *J* = 8.8 Hz, 2H), 7.42-7.41 (m, 4H), 7.40-7.35 (m, 1H), 7.20 (t, *J* = 8.0 Hz, 1H), 6.79 (d, *J* = 8.4 Hz, 1H), 6.73 (t, *J* = 7.6 Hz, 1H), 5.14 (s, 2H), 2.83 (t, *J* = 8.0 Hz, 2H),

2.46 (t,  $J = 8.0$  Hz, 2H);  $^{13}\text{C}$  NMR (100 MHz,  $\text{CDCl}_3$ )  $\delta$ : 156.0, 139.0, 137.2, 136.5, 136.1, 132.4, 131.5, 130.5, 129.5, 128.7, 128.4, 128.1, 127.1, 120.3, 120.2, 110.8, 70.3, 27.9, 21.3; HRMS (ESI-TOF)  $m/z$ :  $\text{C}_{23}\text{H}_{20}^{80}\text{BrO}_3\text{S}$  ( $\text{M} + \text{H}$ ) $^+$  calcd for 455.0311, found 455.0318.

**5-(Benzyloxy)-3-((4-(trifluoromethyl)phenyl)sulfonyl)-1,2-dihydronaphthalene (3ag):** Yield:

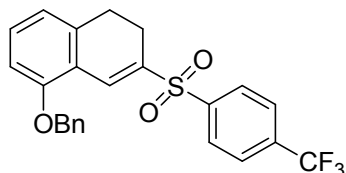

63.9 mg, 72%; white solid, mp 74.7-76.3 °C (uncorrected);  $^1\text{H}$  NMR (400 MHz,  $\text{CDCl}_3$ )  $\delta$ : 8.13 (s, 1H), 8.06 (d,  $J = 8.0$  Hz, 2H), 7.79 (d,  $J = 8.4$  Hz, 2H), 7.43-7.36 (m, 5H), 7.21 (t,  $J = 8.0$  Hz, 1H), 6.80 (d,  $J = 8.4$  Hz, 1H), 6.73 (d,  $J = 7.2$  Hz, 1H), 5.15 (s,

2H), 2.84 (t,  $J = 8.0$  Hz, 2H), 2.47 (t,  $J = 8.0$  Hz, 2H);  $^{13}\text{C}$  NMR (100 MHz,  $\text{CDCl}_3$ )  $\delta$ : 156.1, 137.3, 136.4, 135.5, 131.8, 131.5, 128.7, 128.5, 128.1, 127.2, 126.3, 126.3, 120.3, 120.1, 110.8, 70.4, 27.9, 21.4; HRMS (ESI-TOF)  $m/z$ :  $\text{C}_{24}\text{H}_{20}^{19}\text{F}_3\text{O}_3\text{S}$  ( $\text{M} + \text{H}$ ) $^+$  calcd for 445.1080, found 445.1086.

**1-(4-((8-(Benzyloxy)-3,4-dihydronaphthalen-2-yl)sulfonyl)phenyl)ethanone (3ah):** Yield: 58.5

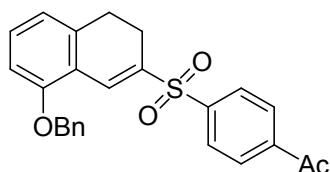

mg, 70%; yellow oil;  $^1\text{H}$  NMR (400 MHz,  $\text{CDCl}_3$ )  $\delta$ : 8.21 (s, 1H), 7.91 (s, 4H), 7.43-7.39 (m, 5H), 7.31-7.26 (m, 1H), 7.03 (t,  $J = 7.2$  Hz, 2H), 5.10 (s, 2H), 3.64 (t,  $J = 8.0$  Hz, 2H), 2.82 (t,  $J = 8.0$  Hz, 2H), 2.62 (s, 3H);  $^{13}\text{C}$  NMR (100 MHz,  $\text{CDCl}_3$ )  $\delta$ : 196.6, 143.2,

140.3, 139.8, 137.5, 136.2, 131.5, 128.9, 128.7, 128.6, 128.5, 128.3, 127.5, 122.1, 121.0, 112.3, 70.4, 41.5, 30.7, 26.9; HRMS (ESI-TOF)  $m/z$ :  $\text{C}_{25}\text{H}_{23}\text{O}_4\text{S}$  ( $\text{M} + \text{H}$ ) $^+$  calcd for 419.1312, found 419.1317.

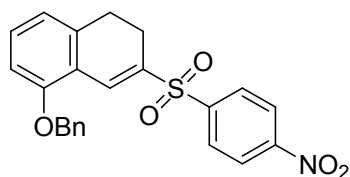

**5-(Benzyloxy)-3-((4-nitrophenyl)sulfonyl)-1,2-**

**dihydronaphthalene (3ai):** Yield: 53.1 mg, 63%; yellow oil;

$^1\text{H}$  NMR (400 MHz,  $\text{CDCl}_3$ )  $\delta$ : 8.36 (d,  $J = 9.2$  Hz, 2H), 8.14-8.11 (m, 3H), 7.43-7.38 (m, 4H), 7.37-7.35 (m, 1H), 7.22 (t,  $J = 8.0$  Hz, 1H), 6.81 (d,  $J = 8.4$  Hz, 1H), 6.74 (d,  $J = 7.6$  Hz, 1H), 5.15 (s, 2H), 2.85 (t,  $J = 8.0$  Hz, 2H), 2.48 (t,  $J = 7.6$  Hz, 2H);  $^{13}\text{C}$  NMR (100 MHz,  $\text{CDCl}_3$ )  $\delta$ : 156.2, 150.4, 145.9, 137.3, 136.3, 135.0, 132.2, 132.1, 129.2, 128.7, 128.2, 127.2, 124.4, 120.3, 119.9, 110.9, 70.4, 27.8, 21.3; HRMS (ESI-TOF)  $m/z$ :  $\text{C}_{23}\text{H}_{20}\text{NO}_5\text{S}$  ( $\text{M} + \text{H}$ ) $^+$  calcd for 422.1057, found 422.1064.

**5-(Benzyloxy)-3-(*m*-tolylsulfonyl)-1,2-dihydronaphthalene (3aj):** Yield: 60.9 mg, 78%; yellow oil;  $^1\text{H}$  NMR (400 MHz,  $\text{CDCl}_3$ )  $\delta$ : 8.05 (s, 1H), 7.73-7.71 (m, 2H), 7.43-7.37 (m, 6H), 7.35-7.32

(m, 1H), 7.18 (t,  $J = 8.0$  Hz, 1H), 6.79 (d,  $J = 8.4$  Hz, 1H), 6.72 (d,  $J = 7.6$  Hz, 1H), 5.13 (s, 2H), 2.82 (t,  $J = 8.4$  Hz, 2H), 2.50-2.46 (m, 2H), 2.41 (s, 3H);  $^{13}\text{C}$  NMR (100 MHz,  $\text{CDCl}_3$ )  $\delta$ : 155.9, 139.7, 139.3, 137.3, 136.9, 136.6, 133.9, 131.2, 129.7, 128.9, 128.6, 128.2, 128.0, 127.1, 125.1, 120.4, 120.3, 110.8, 70.3, 27.9, 21.4, 21.3; HRMS (ESI-TOF)  $m/z$ :  $\text{C}_{24}\text{H}_{23}\text{O}_3\text{S}$  ( $\text{M} + \text{H}$ ) $^+$  calcd for 391.1362, found 391.1368.

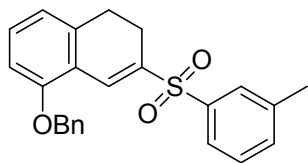

**5-(Benzyloxy)-3-(*o*-tolylsulfonyl)-1,2-dihydronaphthalene (3ak):**

Yield: 56.2 mg, 72%; white oil;  $^1\text{H}$  NMR (400 MHz,  $\text{CDCl}_3$ )  $\delta$ : 8.10 (d,  $J = 7.2$  Hz, 1H), 8.06 (s, 1H), 7.48 (t,  $J = 7.2$  Hz, 1H), 7.42-7.35 (m, 6H), 7.31 (d,  $J = 7.6$  Hz, 1H), 7.17 (d,  $J = 7.6$  Hz, 1H), 7.03 (t,  $J = 8.0$  Hz, 2H), 5.08 (s, 2H), 3.55 (t,  $J = 8.0$  Hz, 2H), 2.78 (t,  $J = 8.0$  Hz, 2H), 2.36 (s, 3H);  $^{13}\text{C}$  NMR (100 MHz,  $\text{CDCl}_3$ )  $\delta$ : 156.7, 138.7, 137.9, 137.3, 136.1, 135.8, 133.7, 132.8, 131.2, 130.4, 128.8, 128.6, 128.2, 127.7, 126.5, 122.4, 121.0, 112.2, 70.4, 41.7, 30.4, 19.9; HRMS (ESI-TOF)  $m/z$ :  $\text{C}_{24}\text{H}_{23}\text{O}_3\text{S}$  ( $\text{M} + \text{H}$ ) $^+$  calcd for 391.1362, found 391.1368.

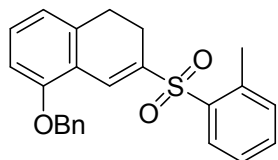

**2-((8-(Benzyloxy)-3,4-dihydronaphthalen-2-yl)sulfonyl)benzonitrile (3al):** Yield: 57.0 mg, 71%; yellow oil;  $^1\text{H}$  NMR (400 MHz,  $\text{CDCl}_3$ )  $\delta$ : 8.30 (s, 1H), 8.20 (d,  $J = 7.6$  Hz, 1H), 7.76-7.68 (m, 3H), 7.38-7.32 (m, 6H), 7.00-6.97 (m, 2H), 5.11 (s, 2H), 3.61 (t,  $J = 8.0$  Hz, 2H), 2.90 (t,  $J = 8.0$  Hz, 2H);  $^{13}\text{C}$  NMR (100 MHz,  $\text{CDCl}_3$ )  $\delta$ : 156.5, 141.3, 141.1, 136.3, 135.9, 135.6, 133.4, 132.9, 131.5, 130.5, 129.2, 128.6, 128.0, 127.3, 122.0, 121.0, 115.3, 112.8, 111.6, 70.4, 41.2, 30.7; HRMS (ESI-TOF)  $m/z$ :  $\text{C}_{24}\text{H}_{20}\text{NO}_3\text{S}$  ( $\text{M} + \text{H}$ ) $^+$  calcd for 402.1158, found 402.1166.

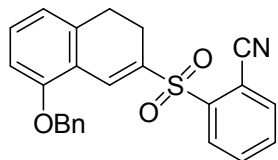

**5-(Benzyloxy)-3-((2-nitrophenyl)sulfonyl)-1,2-dihydronaphthalene (3am):** Yield: 37.9 mg, 45%; yellow oil;  $^1\text{H}$  NMR (400 MHz,  $\text{CDCl}_3$ )  $\delta$ : 8.18 (d,  $J = 8.0$  Hz, 1H), 7.99 (s, 1H), 7.72-7.71 (m, 2H), 7.66-7.63 (m, 1H), 7.40-7.33 (m, 6H), 7.06-6.98 (m, 2H), 5.10 (s, 2H), 3.68 (t,  $J = 8.0$  Hz, 2H), 3.05 (t,  $J = 7.2$  Hz, 2H);  $^{13}\text{C}$  NMR (100 MHz,  $\text{CDCl}_3$ )  $\delta$ : 156.8, 148.7, 138.7, 137.5, 136.3, 134.6, 132.4, 132.2, 132.1, 131.6, 128.9, 128.6, 128.0, 127.3, 124.9, 122.0, 121.0, 112.6, 70.4, 41.4, 30.5; HRMS (ESI-TOF)  $m/z$ :  $\text{C}_{23}\text{H}_{20}\text{NO}_5\text{S}$  ( $\text{M} + \text{H}$ ) $^+$  calcd for 422.1057, found 422.1064.

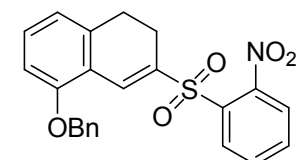

**5-(Benzyloxy)-3-(mesitylsulfonyl)-1,2-dihydronaphthalene (3an):** Yield: 53.5 mg, 64%; yellow oil;  $^1\text{H}$  NMR (400 MHz,  $\text{CDCl}_3$ )  $\delta$ : 7.80 (s, 1H), 7.40-7.36 (m, 5H), 7.28 (t,  $J = 7.6$  Hz, 1H), 7.03-

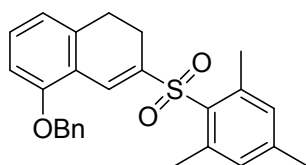

6.98 (m, 2H), 6.87 (s, 2H), 5.04 (s, 2H), 3.61 (t,  $J = 8.0$  Hz, 2H), 2.86 (t,  $J = 8.4$  Hz, 2H), 2.52 (s, 6H), 2.28 (s, 3H);  $^{13}\text{C}$  NMR (100 MHz,  $\text{CDCl}_3$ )  $\delta$ : 156.6, 143.3, 140.8, 139.0, 136.1, 134.9, 132.3, 131.1, 130.9, 128.7, 128.6, 121.1, 127.7, 122.4, 120.9, 112.1, 70.4, 41.9, 30.1, 22.6, 21.0; HRMS (ESI-TOF)  $m/z$ :  $\text{C}_{26}\text{H}_{27}\text{O}_3\text{S}$  ( $\text{M} + \text{H}$ ) $^+$  calcd for 419.1675, found 419.1675.

**6-((8-(Benzyloxy)-3,4-dihydronaphthalen-2-yl)sulfonyl)-2,3-dihydrobenzofuran (3ao):** Yield:

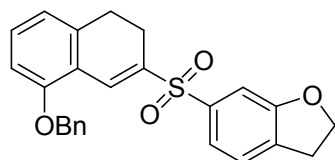

53.4 mg, 65%; yellow oil;  $^1\text{H}$  NMR (400 MHz,  $\text{CDCl}_3$ )  $\delta$ : 7.99 (s, 1H), 7.72-7.71 (m, 2H), 7.41-7.38 (m, 4H), 7.36-7.34 (m, 1H), 7.18 (t,  $J = 8.0$  Hz, 1H), 6.85 (d,  $J = 8.8$  Hz, 1H), 6.78 (d,  $J = 8.4$  Hz, 1H), 6.73 (d,  $J = 7.2$  Hz, 1H), 5.13 (s, 2H), 4.66 (t,  $J = 8.8$  Hz, 2H), 3.24 (t,  $J = 7.2$  Hz, 2H), 2.82 (d,  $J = 8.8$  Hz, 2H), 2.48 (t,  $J = 8.0$  Hz, 2H);  $^{13}\text{C}$  NMR (100 MHz,  $\text{CDCl}_3$ )  $\delta$ : 164.3, 155.8, 137.5, 137.2, 136.6, 131.1, 131.0, 129.8, 128.7, 128.6, 128.5, 128.0, 127.1 (2C), 125.2, 120.3, 110.7, 109.6, 72.3, 70.2, 29.0, 28.0, 21.3; (HRMS (ESI-TOF)  $m/z$ :  $\text{C}_{25}\text{H}_{23}\text{O}_4\text{S}$  ( $\text{M} + \text{H}$ ) $^+$  calcd for 419.1312, found 419.1317.

**2-((8-(Benzyloxy)-3,4-dihydronaphthalen-2-yl)sulfonyl)naphthalene (3ap):** Yield: 67.3 mg,

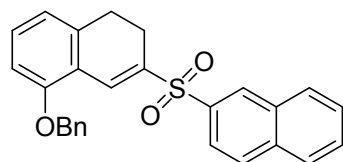

79%; green solid, mp 155.4-156.7  $^{\circ}\text{C}$  (uncorrected);  $^1\text{H}$  NMR (400 MHz,  $\text{CDCl}_3$ )  $\delta$ : 8.03 (d,  $J = 8.8$  Hz, 1H), 7.99-7.96 (m, 2H), 7.92-7.87 (m, 2H), 7.62-7.59 (m, 2H), 7.37-7.32 (m, 4H), 7.28 (t,  $J = 7.6$  Hz, 2H), 7.22 (d,  $J = 7.2$  Hz, 1H), 7.04-6.98 (m, 2H), 5.13 (s, 2H), 3.51 (t,  $J = 6.8$  Hz, 2H), 3.42 (t,  $J = 6.4$  Hz, 2H);  $^{13}\text{C}$  NMR (100 MHz,  $\text{CDCl}_3$ )  $\delta$ : 155.9, 137.3, 136.6, 136.6, 136.5, 135.1, 132.2, 131.3, 130.1, 129.5, 129.5, 129.3, 129.0, 128.7, 128.0, 127.9, 127.5, 127.1, 122.9, 120.4, 120.3, 110.7, 70.3, 27.9, 21.4; HRMS (ESI-TOF)  $m/z$ :  $\text{C}_{27}\text{H}_{23}\text{O}_3\text{S}$  ( $\text{M} + \text{H}$ ) $^+$  calcd for 427.1362, found 427.1369.

**5-(Benzyloxy)-3-(phenylsulfonyl)-1,2-dihydronaphthalene (3aq):** Yield: 64.7 mg, 86%; yellow

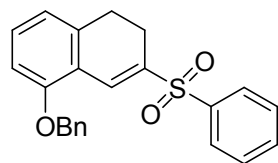

solid, mp 105.0-156.6  $^{\circ}\text{C}$  (uncorrected);  $^1\text{H}$  NMR (400 MHz,  $\text{CDCl}_3$ )  $\delta$ : 8.07 (s, 1H), 7.93 (d,  $J = 8.0$  Hz, 2H), 7.59 (d,  $J = 7.2$  Hz, 1H), 7.52 (t,  $J = 7.2$  Hz, 2H), 7.43-7.36 (m, 4H), 7.35-7.32 (m, 1H), 7.18 (t,  $J = 8.0$  Hz, 2H), 6.79 (d,  $J = 8.4$  Hz, 1H), 6.72 (d,  $J = 7.6$  Hz, 1H), 5.14 (s, 2H), 2.82 (t,  $J = 8.0$  Hz, 2H), 2.50-2.45 (m, 2H);  $^{13}\text{C}$  NMR (100 MHz,  $\text{CDCl}_3$ )  $\delta$ : 155.9, 139.8, 137.2, 136.6, 136.5, 133.1, 131.3, 129.9, 129.1, 128.7, 128.0, 127.9, 127.1, 120.3, 120.3, 110.7, 70.3,

27.9, 21.3; HRMS (ESI-TOF)  $m/z$ :  $C_{23}H_{21}O_3S$  ( $M + H$ )<sup>+</sup> calcd for 377.1206, found 377.1211.

**2-((8-(Benzyloxy)-3,4-dihydronaphthalen-2-yl)sulfonyl)thiophene (3ar)**: Yield: 50.4 mg, 66%;

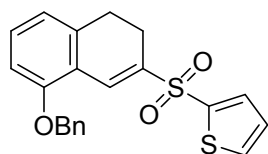

yellow solid, mp 83.4-85.1 °C (uncorrected); <sup>1</sup>H NMR (400 MHz, CDCl<sub>3</sub>) δ: 8.16 (s, 1H), 7.63-7.62 (m, 2H), 7.40-7.35 (m, 5H), 7.31 (d,  $J = 7.2$  Hz, 2H), 7.05-7.01 (m, 3H), 5.10 (s, 2H), 3.66 (t,  $J = 8.0$  Hz,

2H), 2.97 (t,  $J = 8.0$  Hz, 2H); <sup>13</sup>C NMR (100 MHz, CDCl<sub>3</sub>) δ: 156.7, 140.7, 138.9, 137.9, 136.3,

134.1, 131.3, 128.7, 128.6, 128.4, 128.1, 127.8, 127.3, 122.3, 121.0, 112.4, 70.3, 41.7, 30.7;

HRMS (ESI-TOF)  $m/z$ :  $C_{21}H_{19}O_3S_2$  ( $M + H$ )<sup>+</sup> calcd for 383.0770, found 383.0775.

**S-*p*-tolyl 4-methylbenzenesulfonothioate (4)**: yield: 11.7 mg, 21%; <sup>1</sup>H NMR (400 MHz, CDCl<sub>3</sub>)

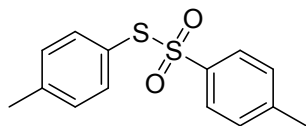

δ: 7.46 (d,  $J = 8.4$  Hz, 2H), 7.25-7.21 (m, 4H), 7.14 (d,  $J = 8.0$  Hz, 2H), 2.43 (s, 3H), 2.38 (s, 3H); <sup>13</sup>C NMR (100 MHz, CDCl<sub>3</sub>) δ:

144.6, 142.0, 140.4, 136.5, 130.2, 129.3, 127.6, 124.5, 21.7, 21.5;

HRMS (ESI-TOF)  $m/z$ :  $C_{14}H_{15}O_2S_2$  ( $M + H$ )<sup>+</sup> calcd for 279.0508, found 279.0516.

#### 4. References

[1] Zhu, Z.-Z.; Chen, K.; Yu, L.-Z.; Tang, X.-Y.; Shi, M. *Org. Lett.* **2015**, *17*, 5994–5997.

[2] Liu, Y.; Wang, Q. L.; Zhou, C. S.; Xiong, B. Q.; Zhang, P. L.; Yang, C. A.; Tang, K. W. *J. Org. Chem.* **2017**, *82*, 7394–7401.

[3] Liu, Y.; Wang, Q. L.; Zhou, C. S.; Xiong, B. Q.; Zhang, P. L.; Yang, C. A.; Tang, K. W. *J. Org. Chem.* **2018**, *83*, 4657–4664.

### 5-(Benzyloxy)-3-tosyl-1,2-dihydronaphthalene (3aa)

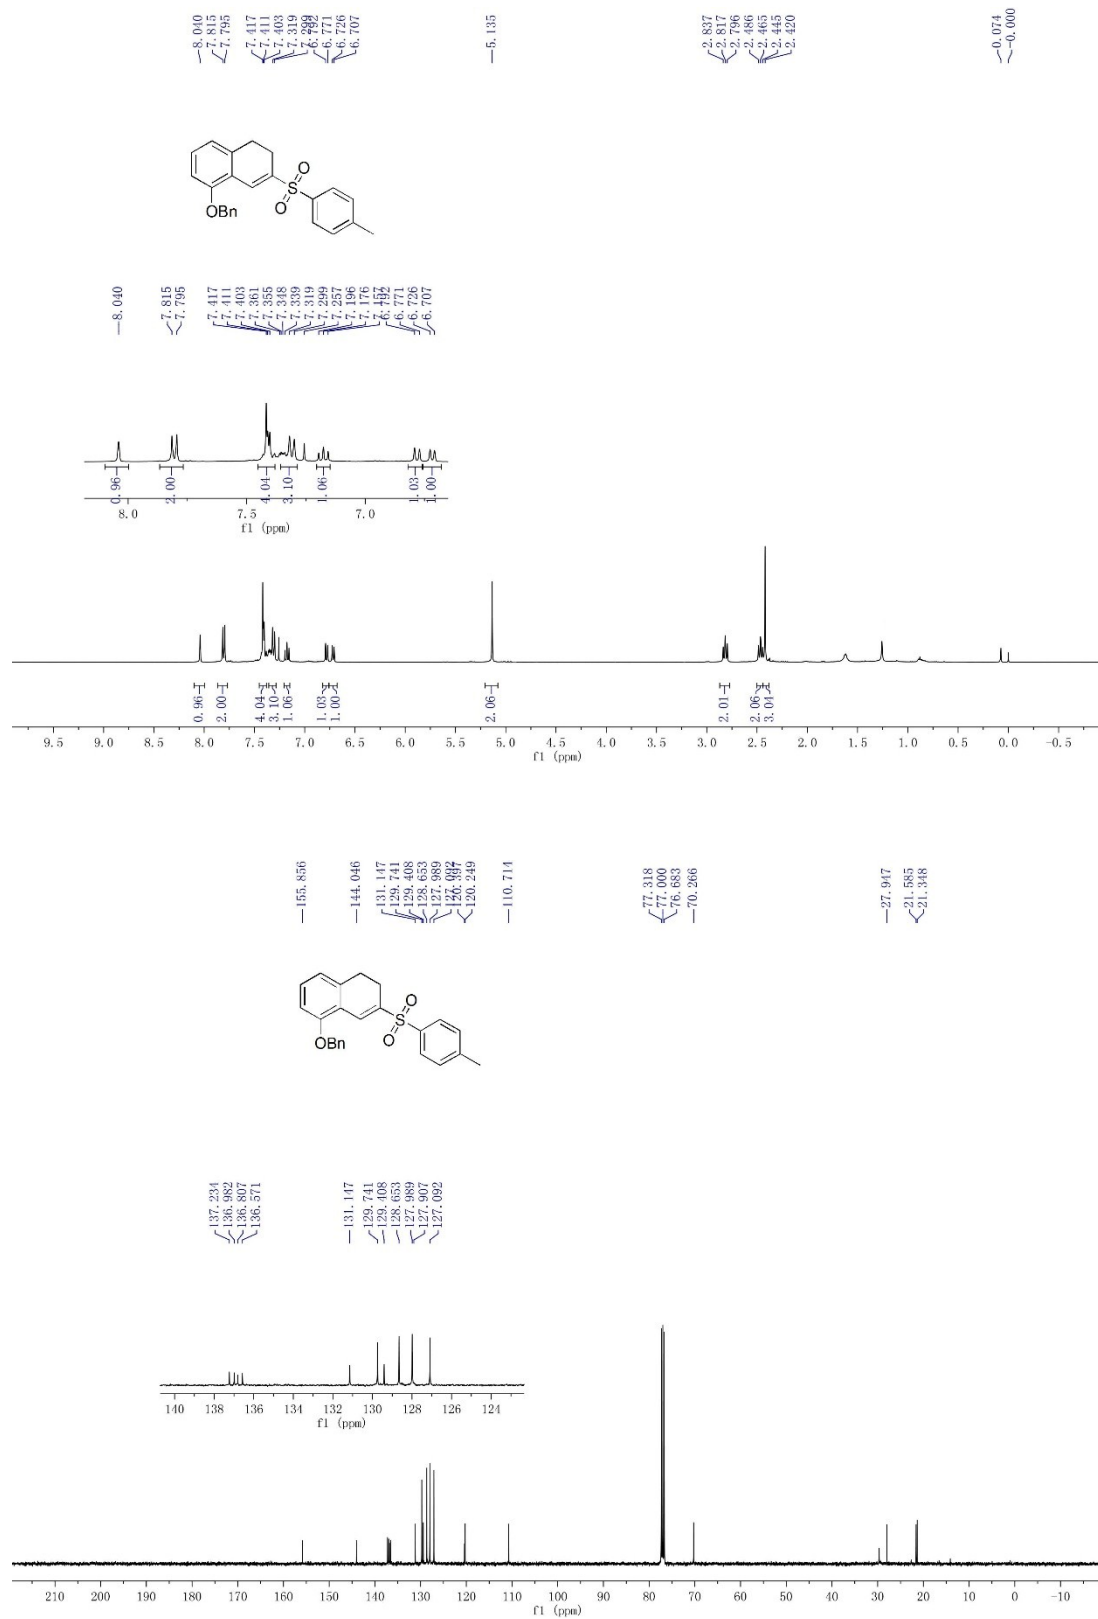

5-Methoxy-3-tosyl-1,2-dihydronaphthalene (3ba)

8.019  
7.816  
7.795  
7.321  
7.301  
7.284  
7.224  
6.760  
6.739  
6.720  
6.702

3.862

2.833  
2.813  
2.791  
2.466  
2.443  
2.422

0.072  
0.000

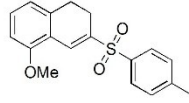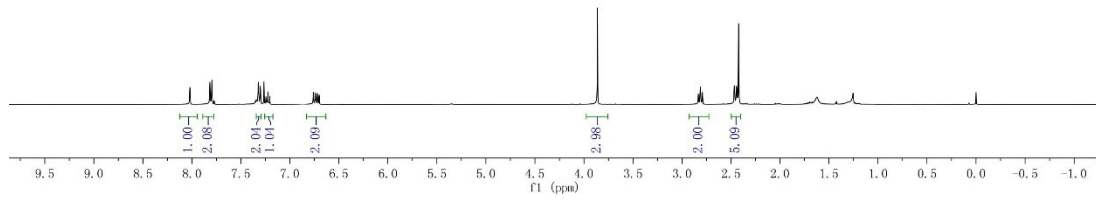

156.787  
143.999  
137.079  
136.853  
136.609  
131.255  
129.746  
129.627  
128.627  
126.664  
119.925  
108.110

77.318  
77.000  
76.683

55.510

27.906  
21.579  
21.361

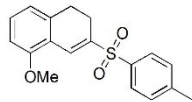

156.787  
143.999  
137.079  
136.853  
136.609  
131.255  
129.746  
129.627  
128.627  
126.664  
119.925  
108.110

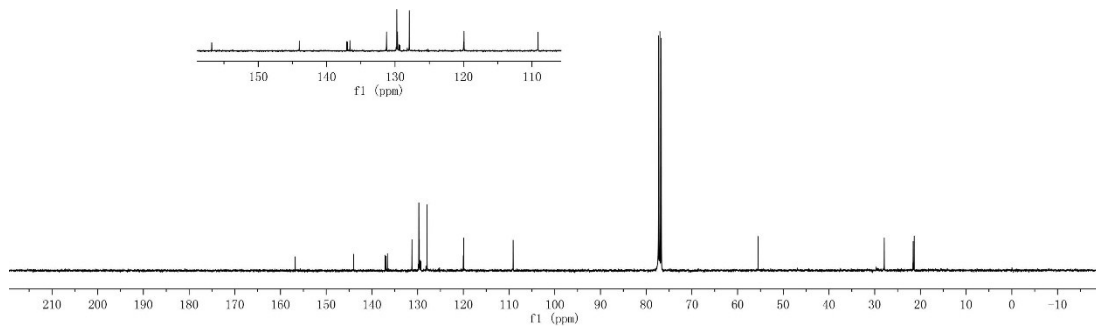

**6-(Benzyloxy)-3-tosyl-1,2-dihydronaphthalene (3ca)**

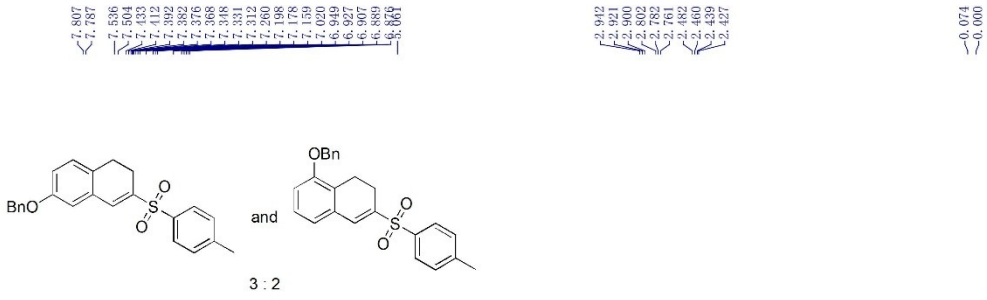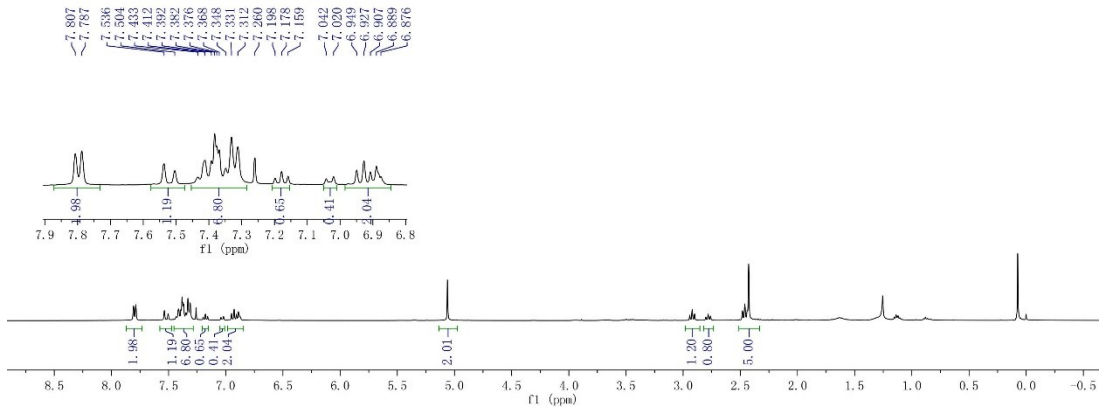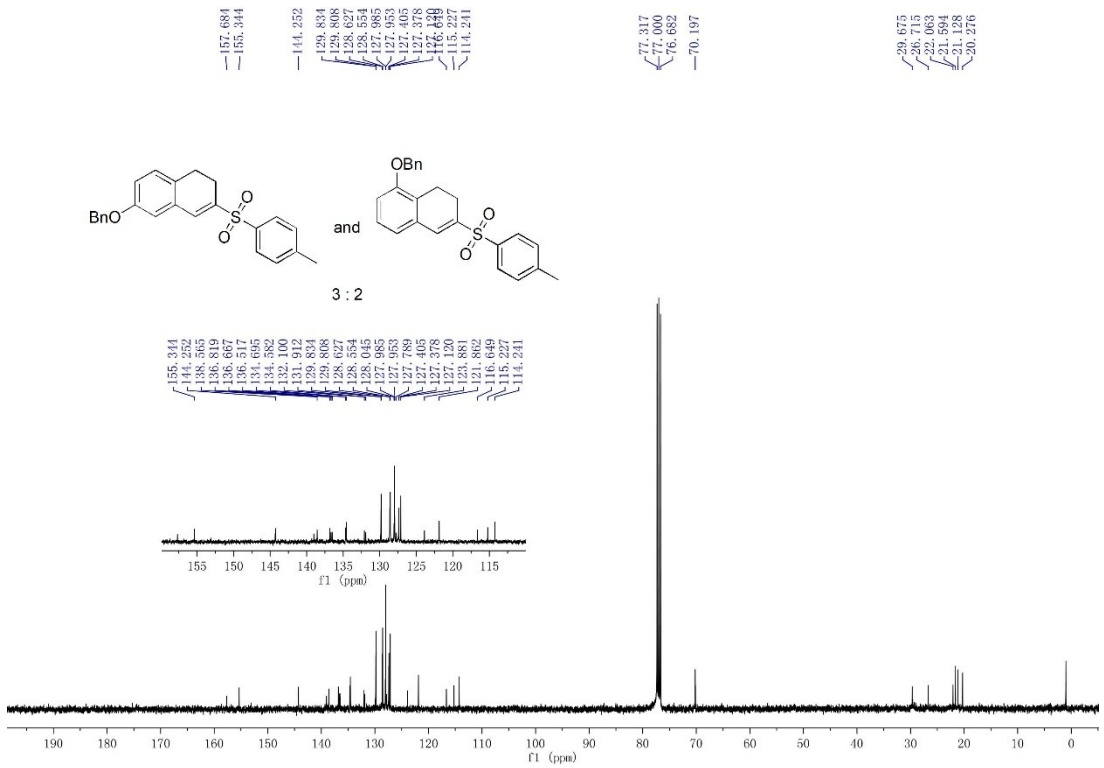



6-Methoxy-3-tosyl-1,2-dihydronaphthalene (3da)

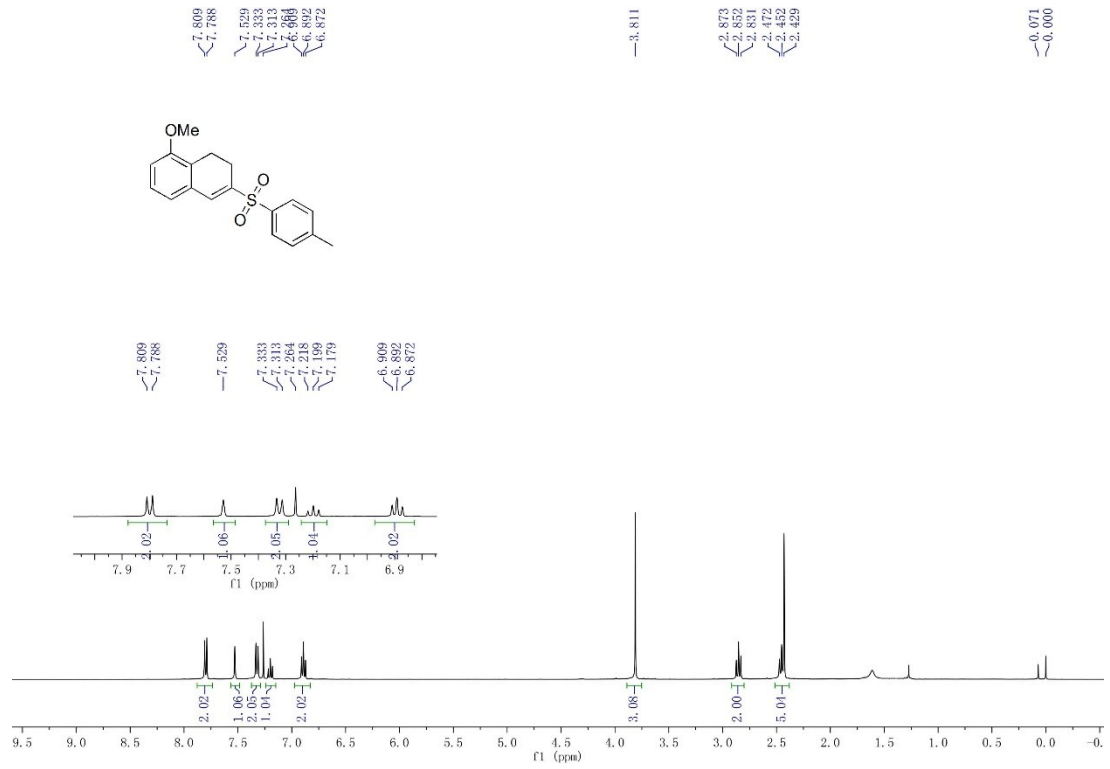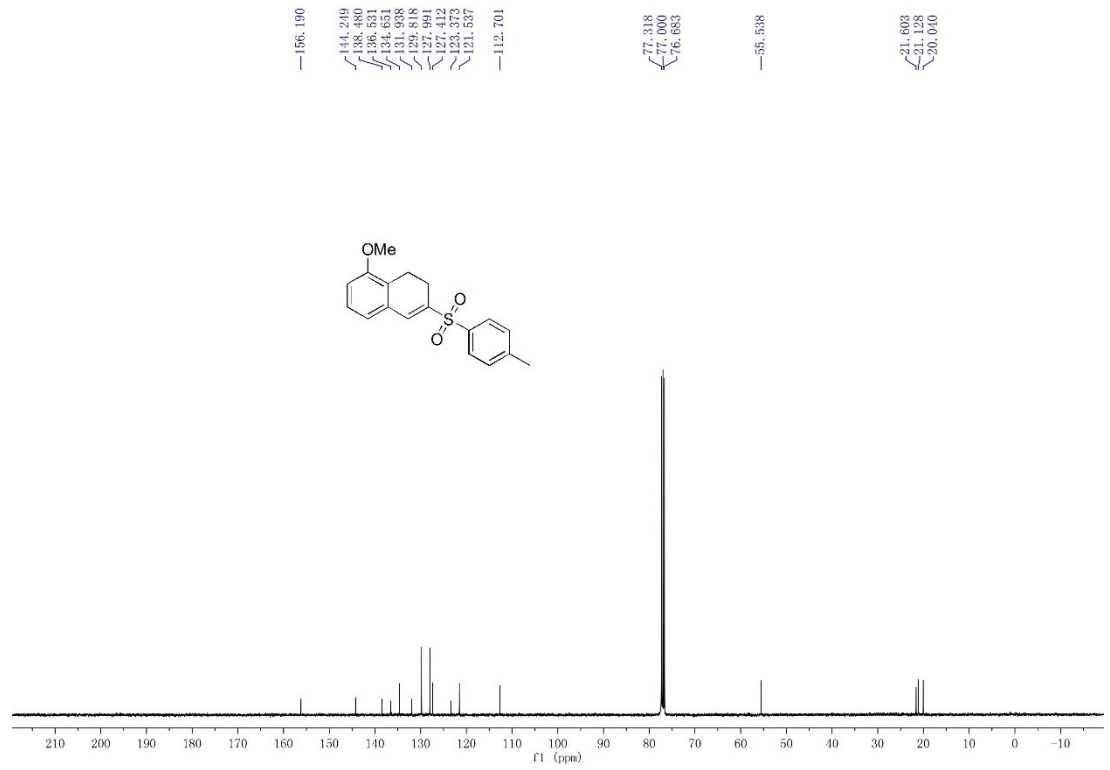

7-(Benzyloxy)-3-tosyl-1,2-dihydronaphthalene yellow solid (3ea)

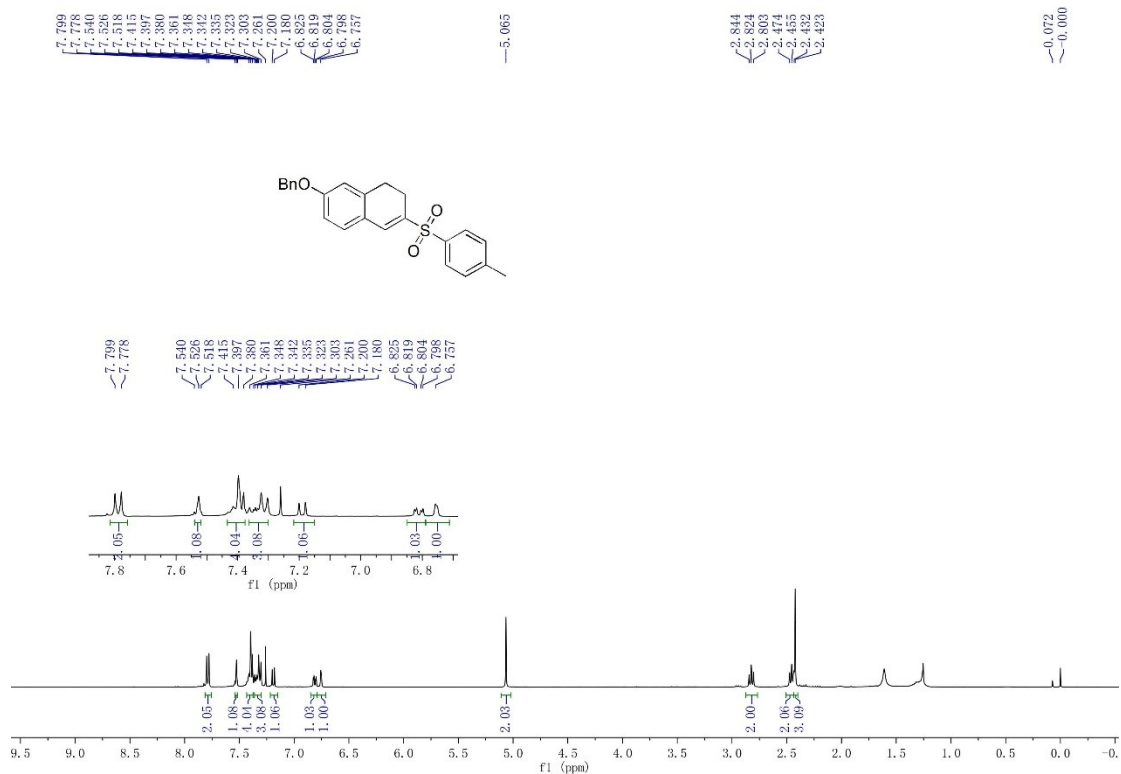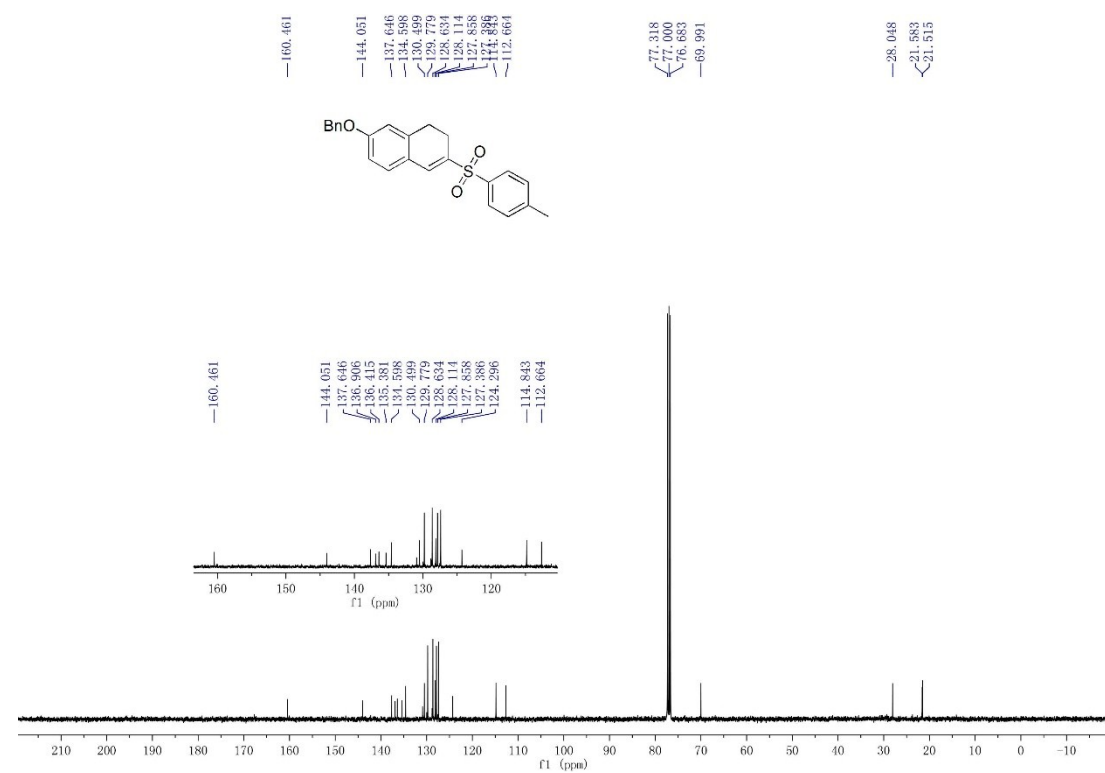

7-Methoxy-3-tosyl-1,2-dihydronaphthalene (3fa)

7.802  
7.798  
7.786  
7.782  
7.532  
7.325  
7.305  
7.263  
7.187  
6.759  
6.753  
6.738  
6.732  
6.675  
6.670

— 3.806

2.852  
2.832  
2.810  
2.481  
2.477  
2.459  
2.456  
2.439  
2.436  
2.425

< 0.072  
< 0.000

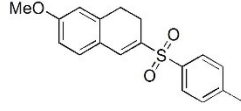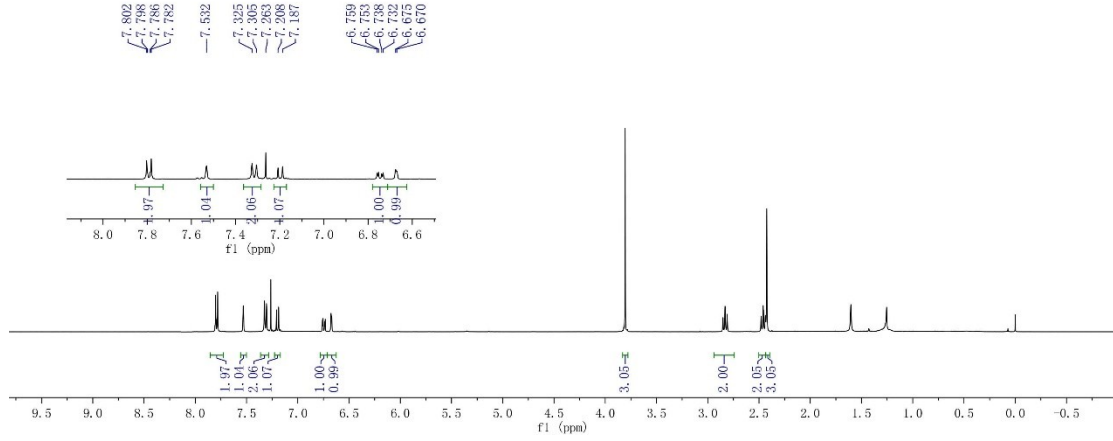

161.309  
144.039  
137.636  
136.915  
135.202  
134.656  
130.504  
129.772  
127.814  
124.056  
113.961  
111.785

77.318  
77.000  
76.683

55.335

28.058  
21.573  
21.523

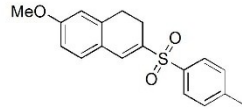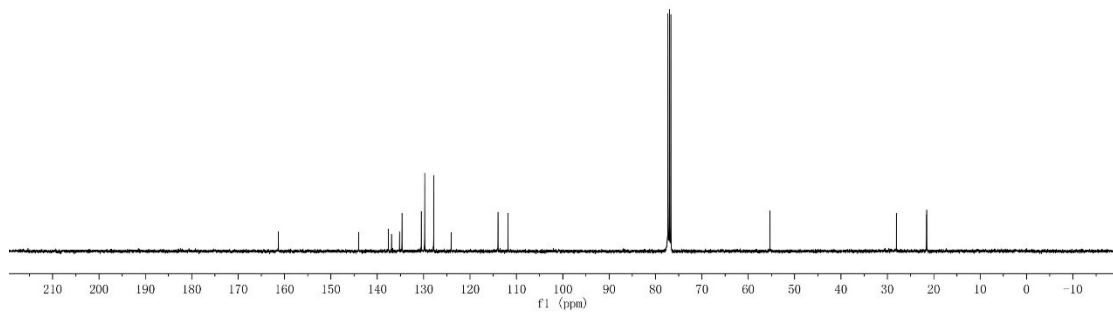

**7-Methyl-3-tosyl-1,2-dihydronaphthalene (3ga)**

7.895  
7.817  
7.797  
7.782  
7.566  
7.517  
7.317  
7.262  
7.175  
7.156  
7.137  
7.089  
7.050  
6.907  
6.949

2.895  
2.885  
2.784  
2.460  
2.456  
2.455

0.075  
-0.000

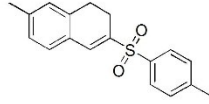

7.825  
7.797  
7.782

7.366  
7.337  
7.317  
7.262  
7.175  
7.156  
7.137  
7.089  
7.050  
6.949

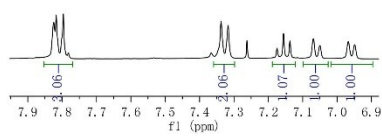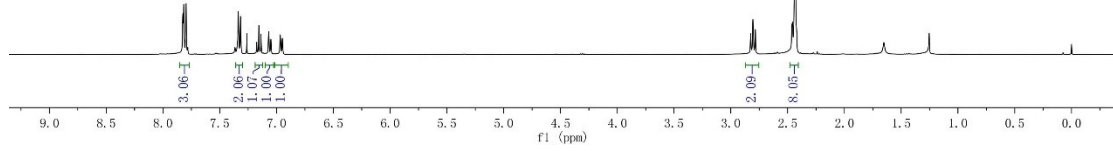

144.208  
138.281  
136.660  
136.535  
135.883  
131.386  
129.896  
129.813  
129.813  
128.844  
127.837  
125.521

77.318  
77.000  
76.682

28.260  
21.584  
21.438  
19.000

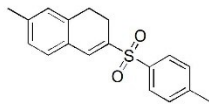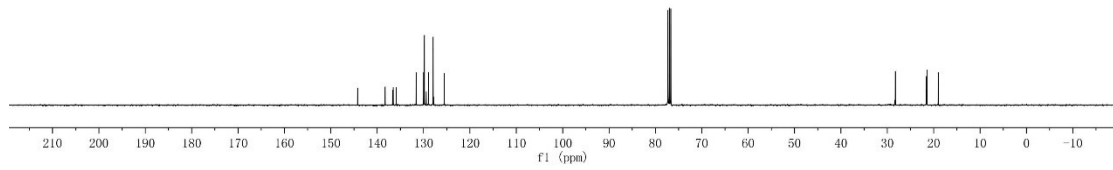

### 7-Phenyl-3-tosyl-1,2-dihydronaphthalene (3ha)

7.826  
7.810  
7.578  
7.576  
7.478  
7.453  
7.453  
7.438  
7.416  
7.374  
7.371  
7.361  
7.341  
7.321  
7.260  
7.258

2.949  
2.928  
2.907  
2.531  
2.510  
2.533

0.076  
0.000

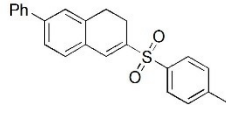

7.826  
7.610  
7.578  
7.576  
7.455  
7.453  
7.416  
7.376  
7.374  
7.361  
7.341  
7.321  
7.260  
7.258

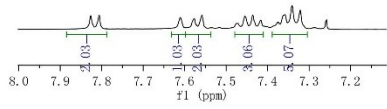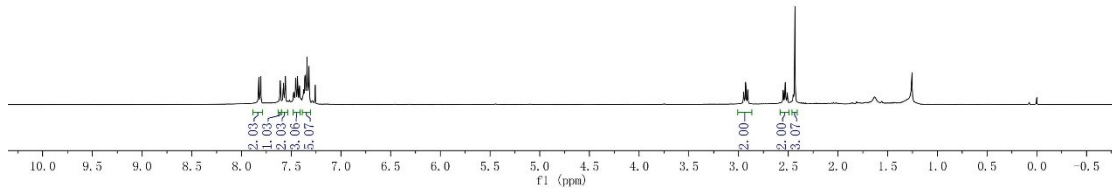

144.284  
143.198  
138.244  
138.244  
136.586  
135.994  
134.367  
130.066  
129.848  
129.392  
127.626  
127.792  
126.881  
126.526  
125.755

77.318  
77.000  
76.683

27.782  
21.767  
21.583

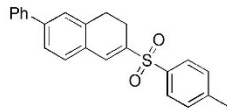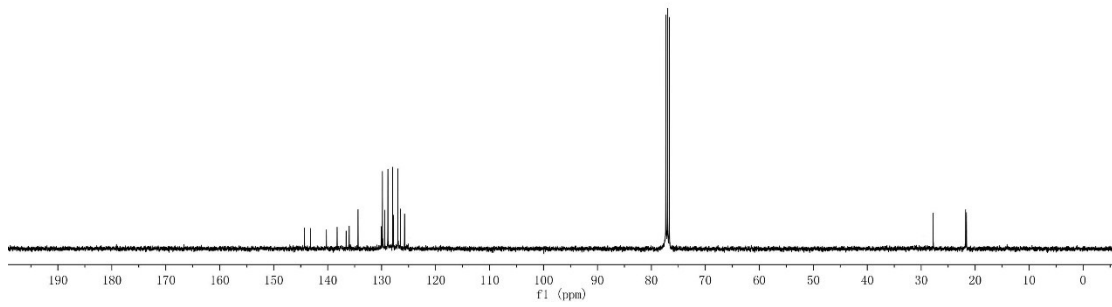

### 7-Chloro-3-tosyl-1,2-dihydronaphthalene (3ia)

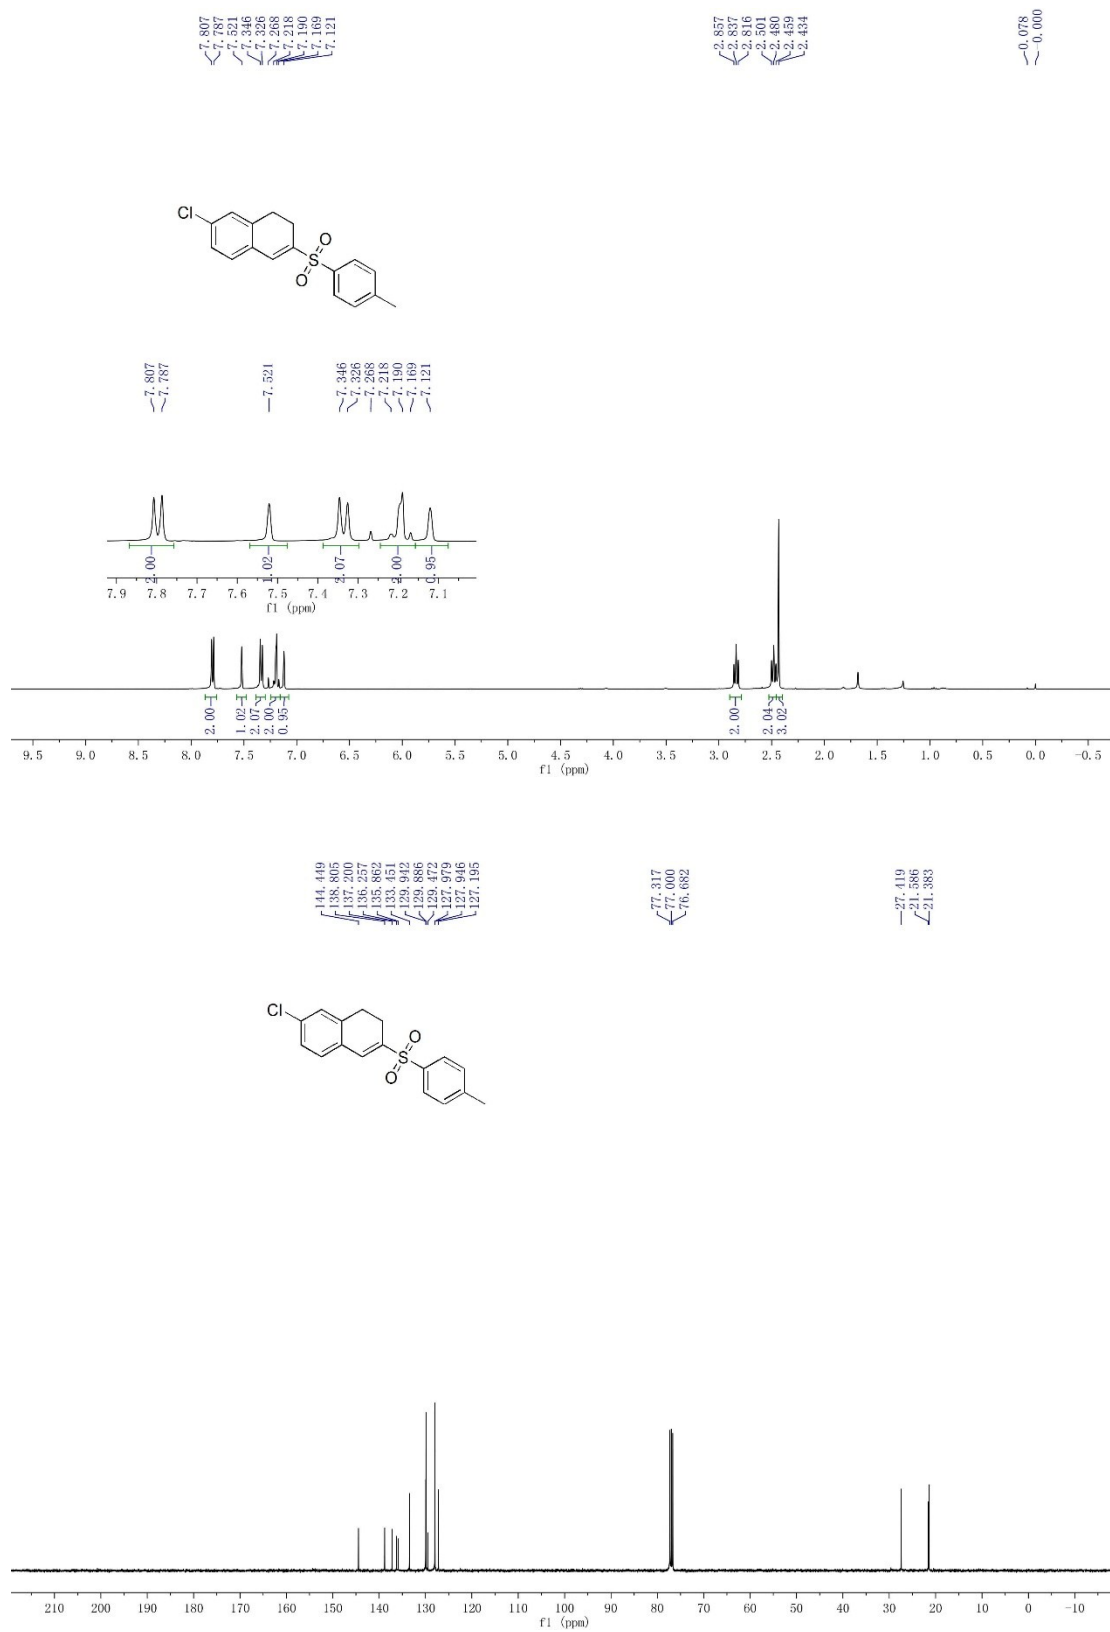

### 3-Tosyl-7-(trifluoromethyl)-1,2-dihydronaphthalene (3ja)

7.820  
7.799  
7.730  
7.480  
7.373  
7.359  
7.320  
7.264

2.939  
2.898  
2.554  
2.535  
2.513  
2.443

0.073  
0.000

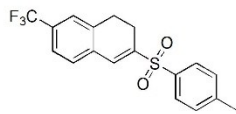

7.820  
7.799

7.571

7.500  
7.480

7.373

7.359

7.339

7.320

7.264

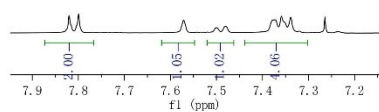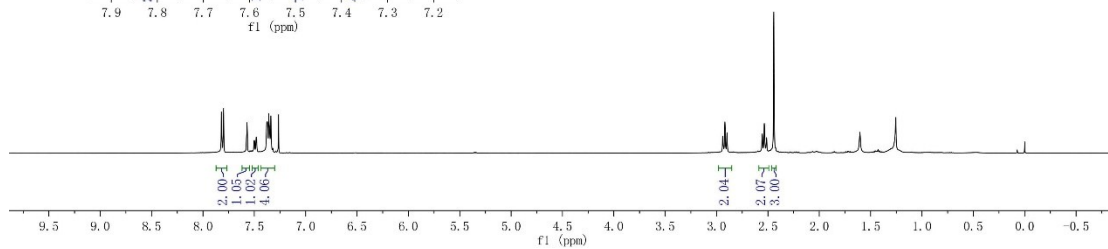

144.719  
141.330  
136.112  
135.981  
135.860  
132.866  
129.989  
129.850  
128.963  
128.124  
128.021  
124.948  
124.702  
124.054  
122.364

77.318  
77.000  
76.683

27.431  
21.632  
21.501

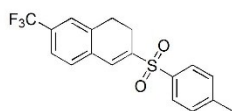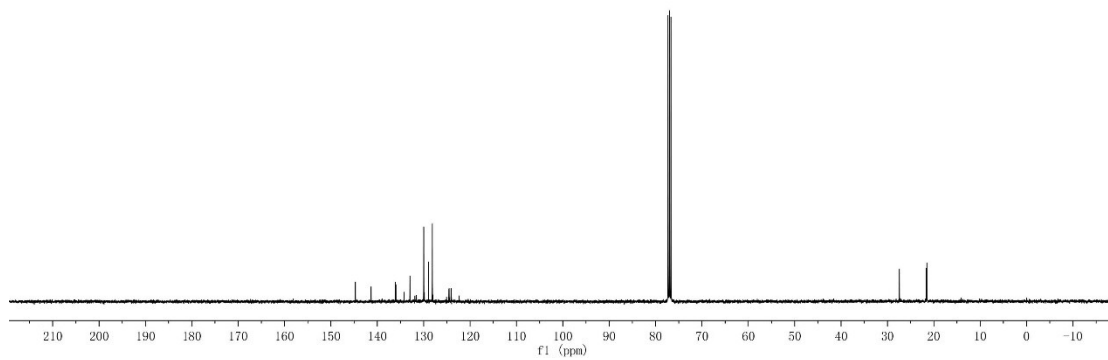

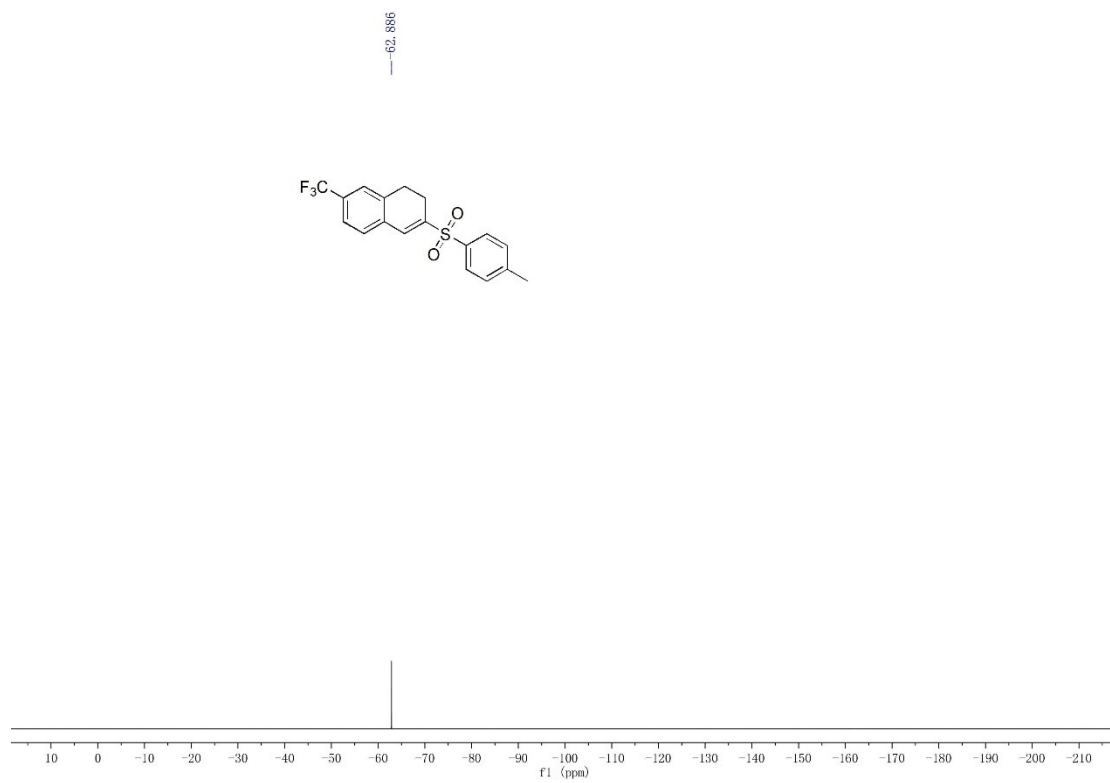



**5,7-Dimethoxy-3-tosyl-1,2-dihydronaphthalene (3ka)**

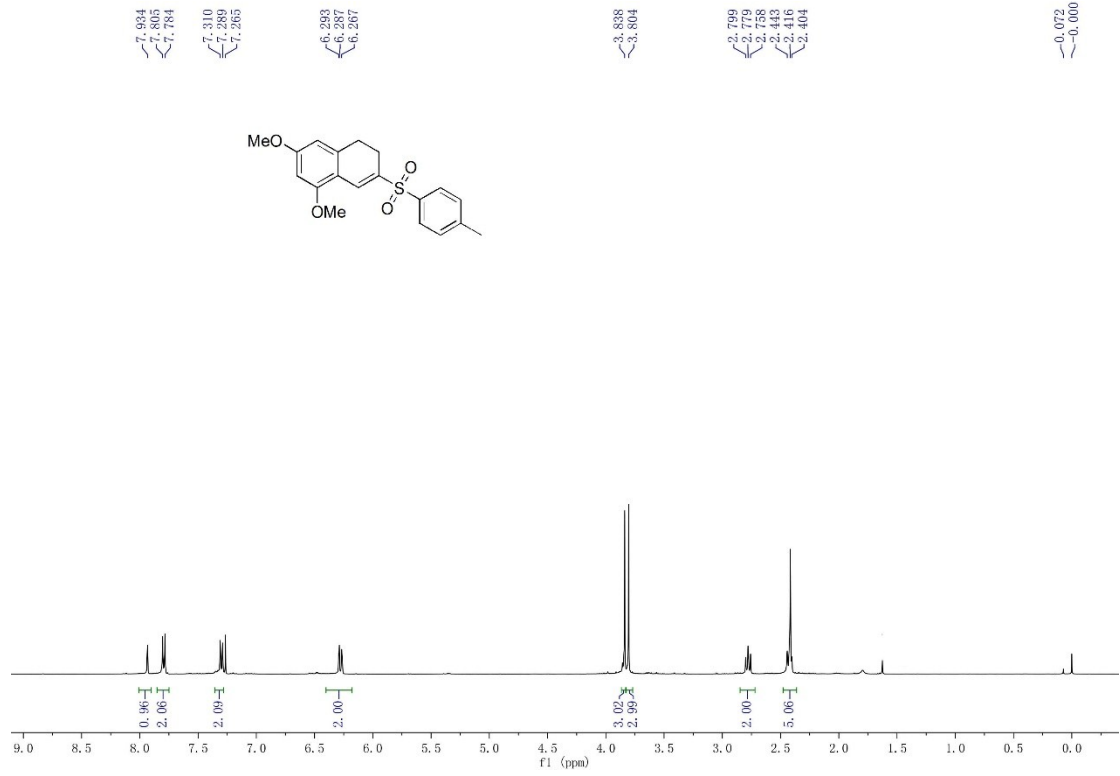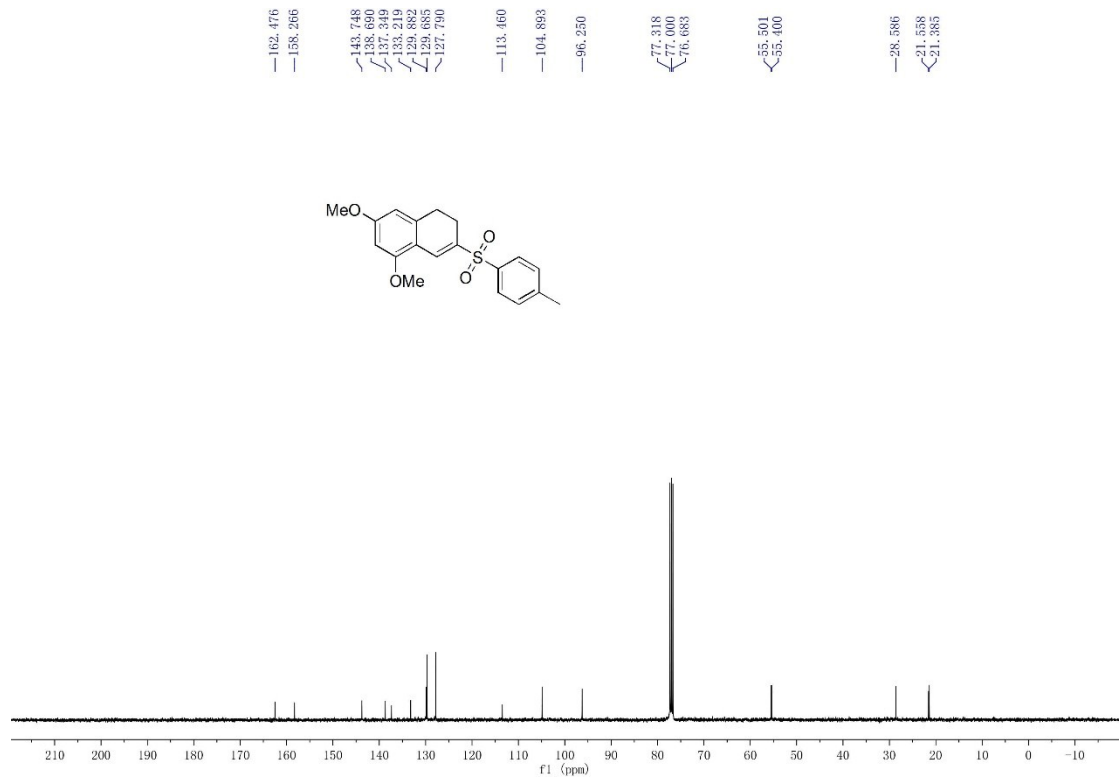

**6,7-Dimethoxy-3-tosyl-1,2-dihydronaphthalene (3la)**

7.807  
7.786  
7.501  
7.331  
7.311  
7.288  
6.793  
6.656

3.883

2.822  
2.780  
2.481  
2.460  
2.439  
2.428

0.073  
0.000

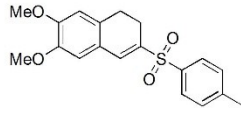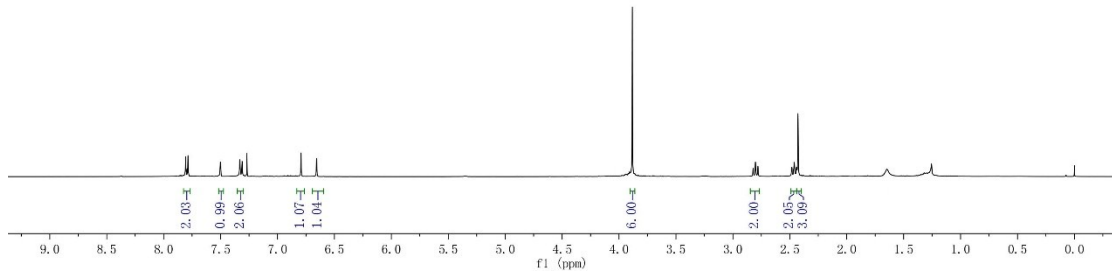

150.530  
147.677  
144.075  
136.904  
135.671  
134.766  
129.870  
127.875  
127.865  
123.548  
111.853  
110.364

77.318  
77.000  
76.683

56.078  
55.997

27.498  
21.740  
21.587

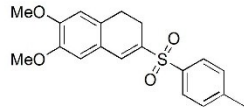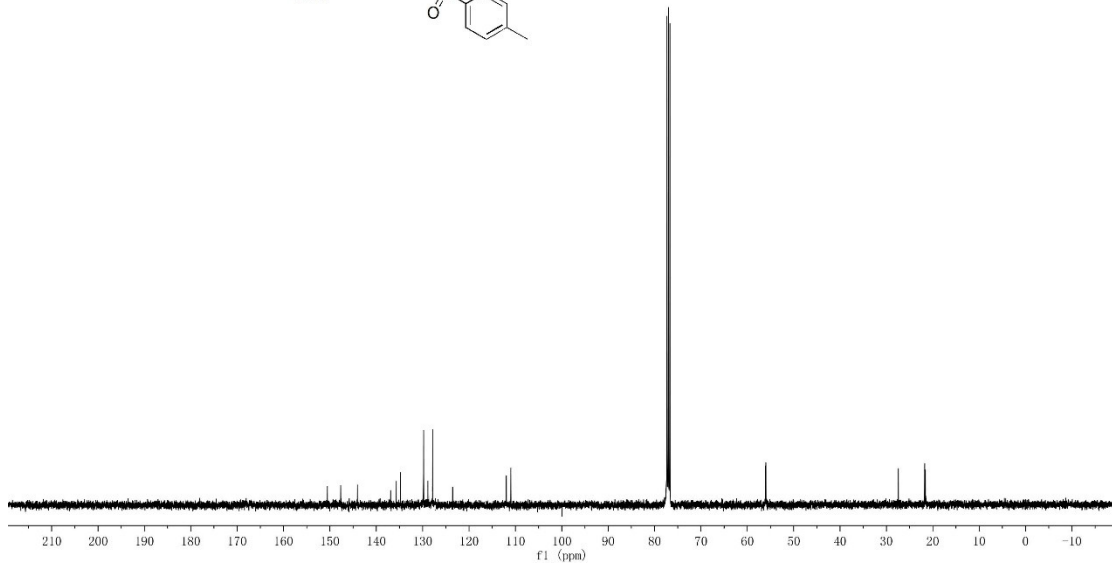

**5-Bromo-7-tosyl-8,9-dihydro[1,2-d][1,3]dioxole (3ma)**

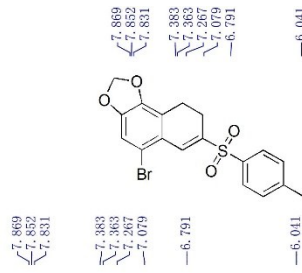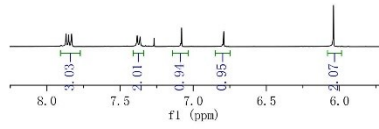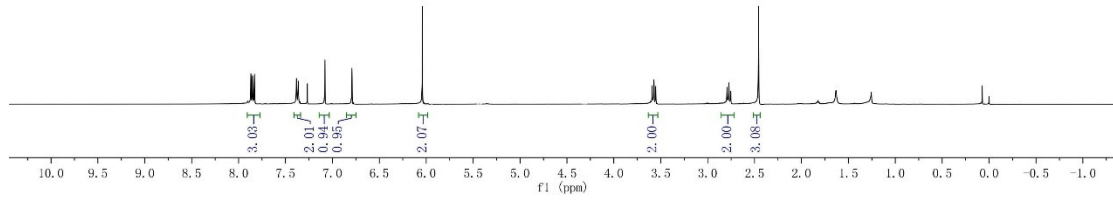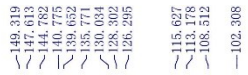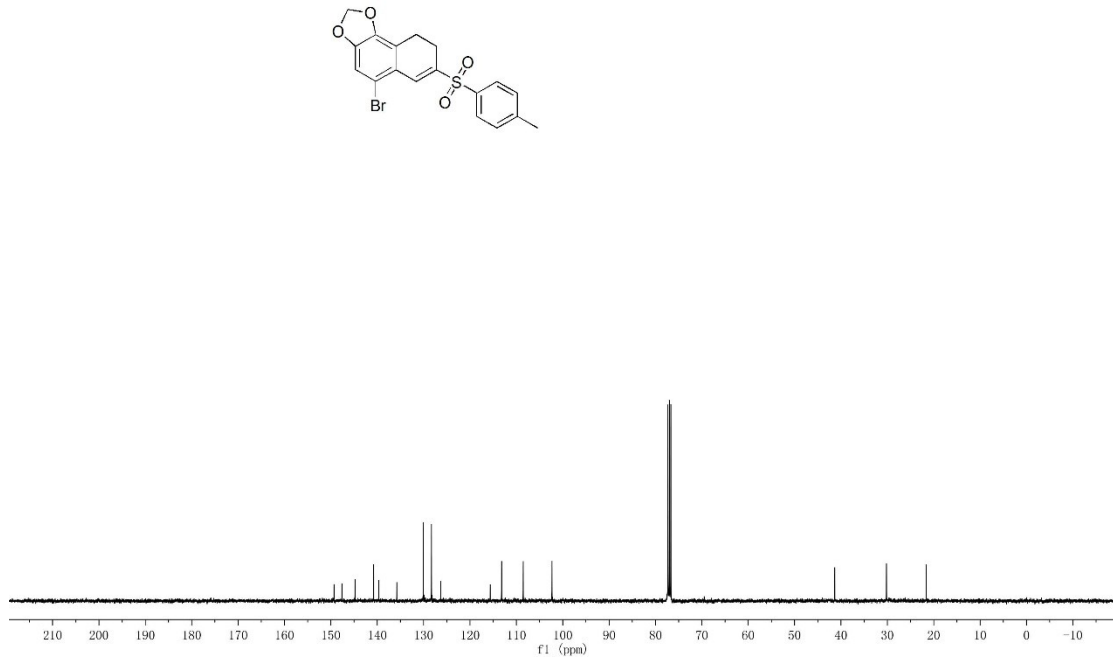

### 3-Tosyl-1,2-dihydronaphthalene (3na)

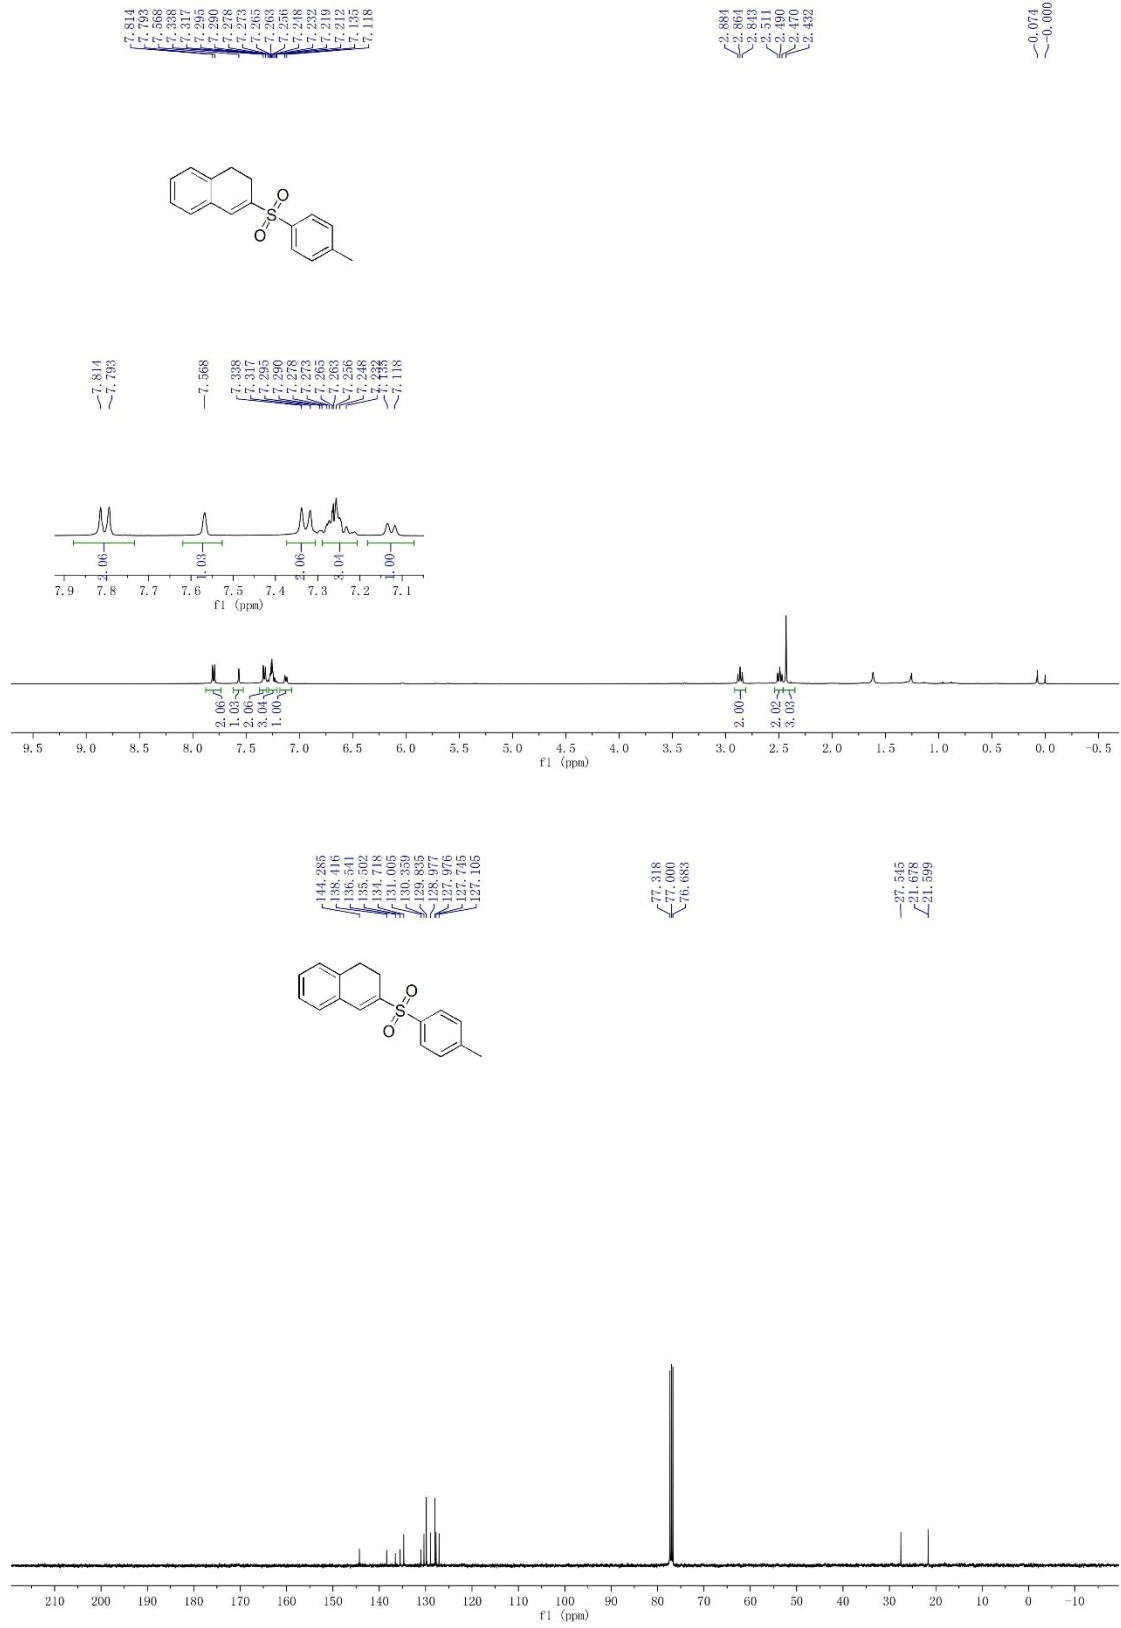

**5-(Benzyloxy)-3-((4-*tert*-butyl)phenyl)sulfonyl)-1,2-dihydronaphthalene (3ab)**

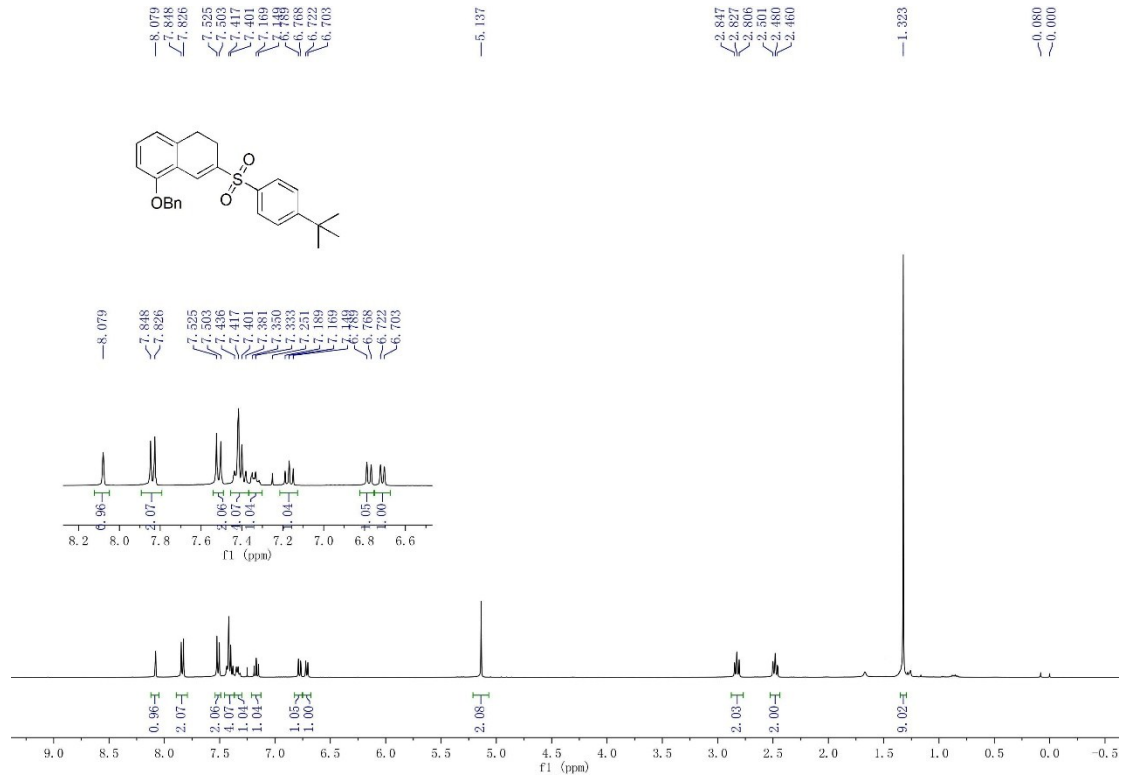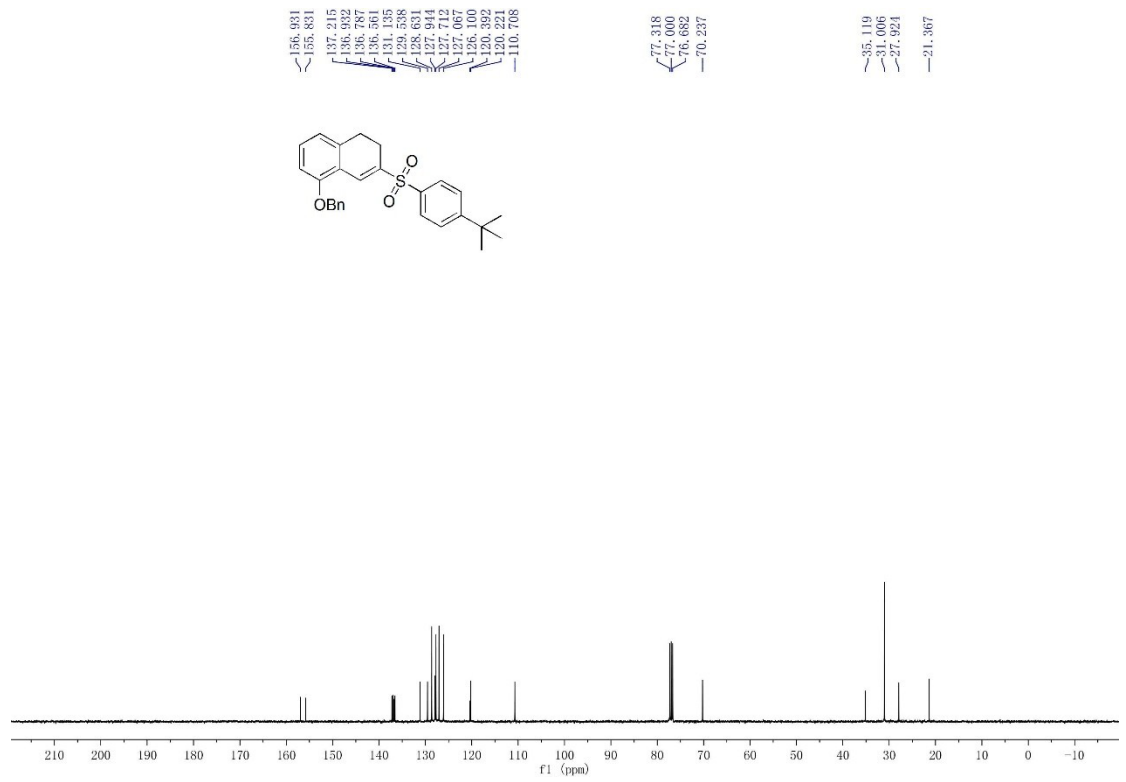



**5-(Benzyloxy)-3-((4-fluorophenyl)sulfonyl)-1,2-dihydronaphthalene (3ad)**

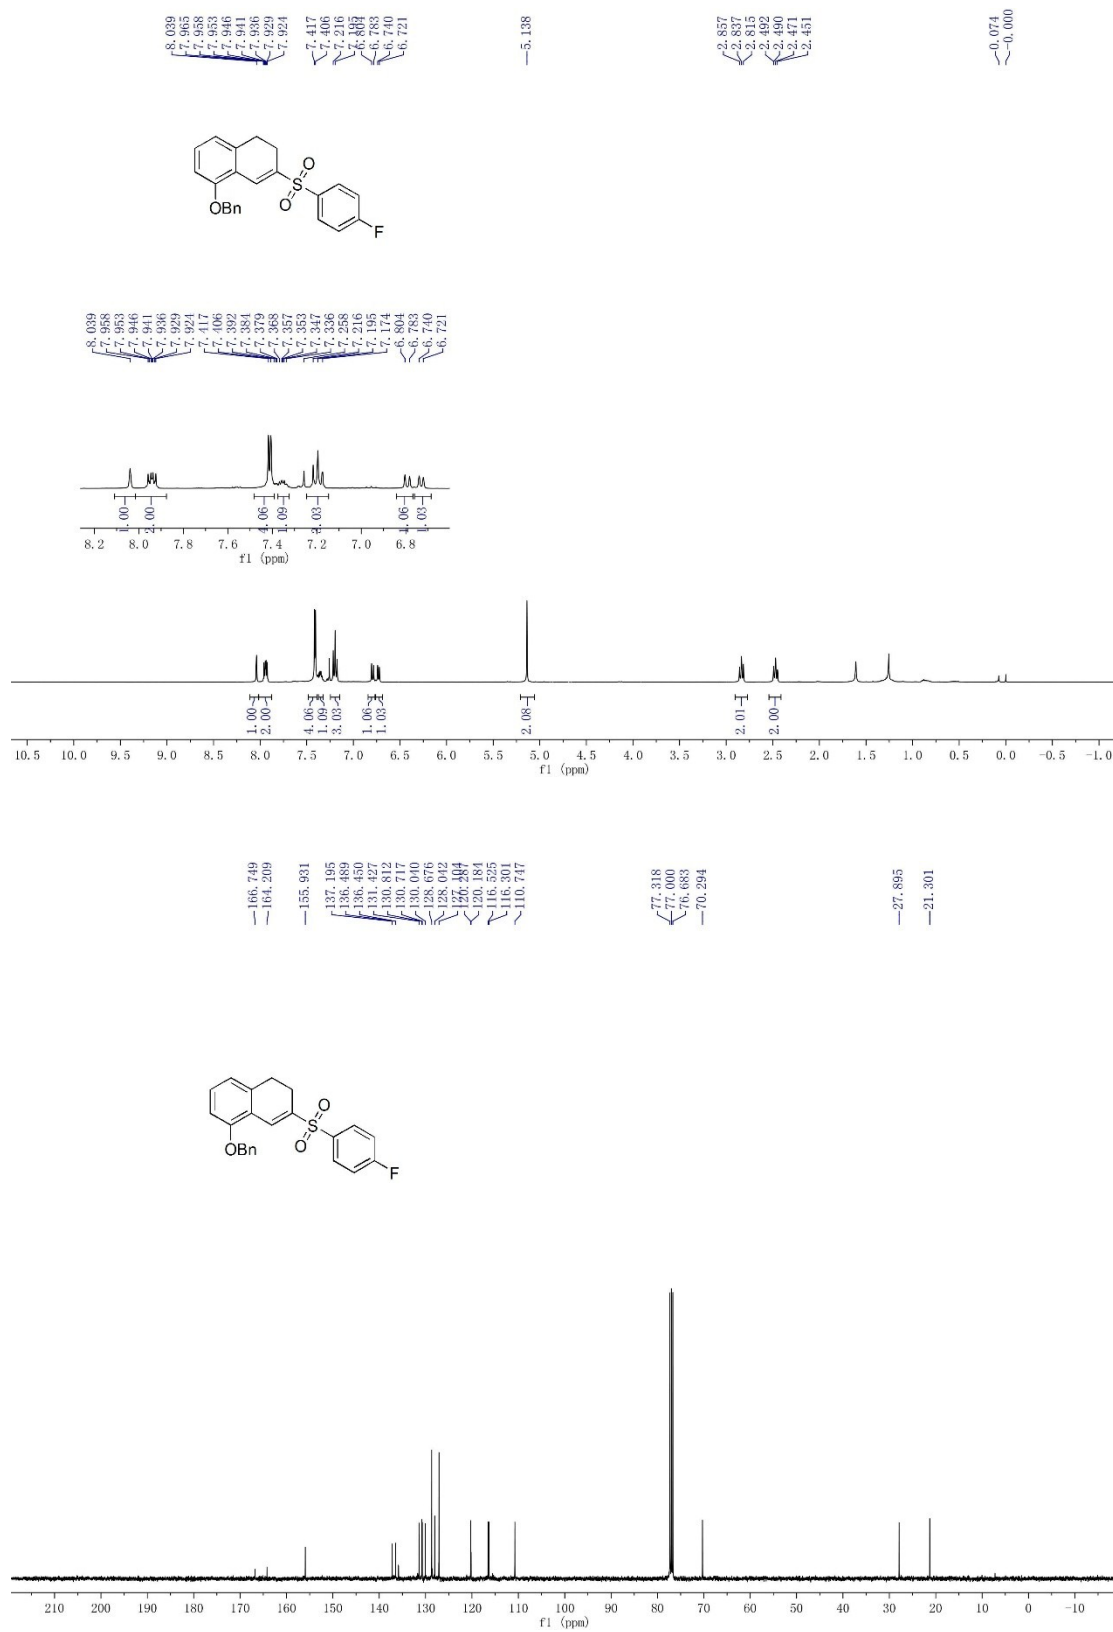

— 101.311

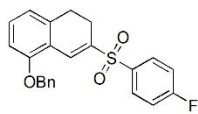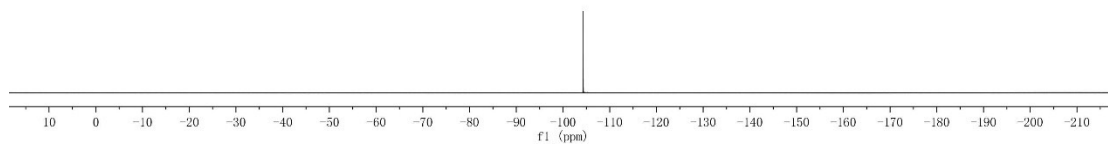



**5-(Benzyloxy)-3-((4-chlorophenyl)sulfonyl)-1,2-dihydronaphthalene (3ae)**

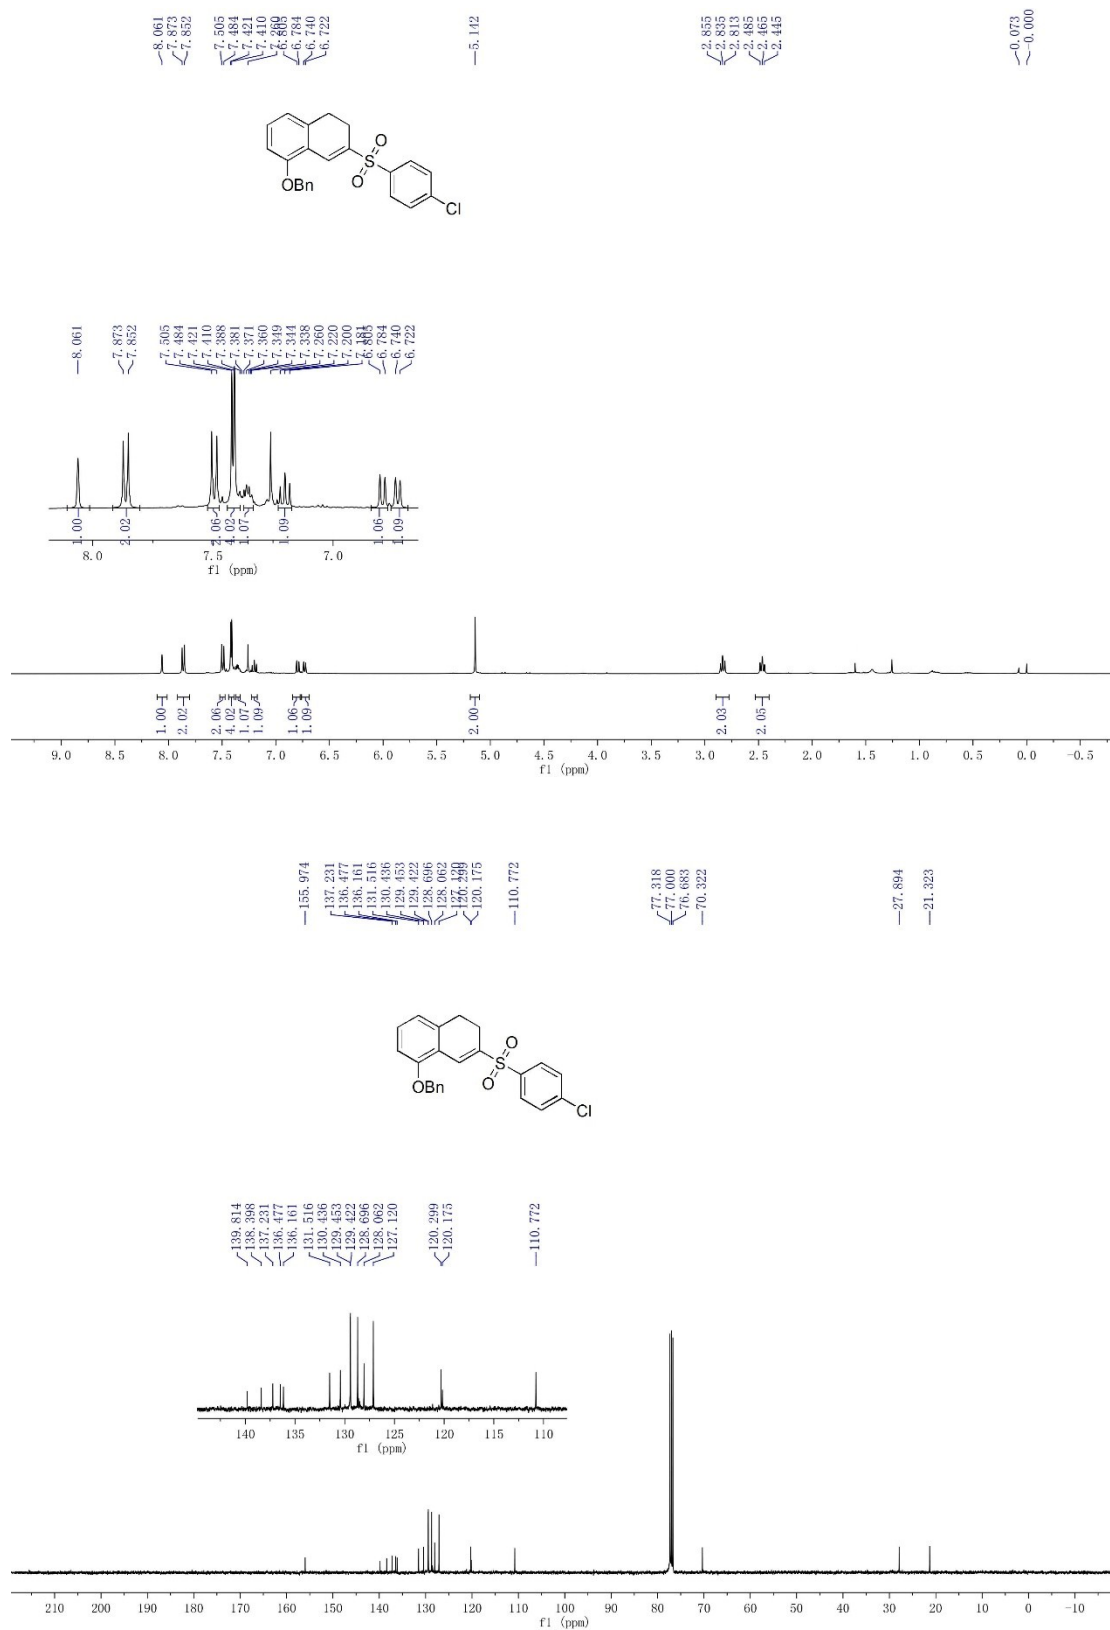



**5-(Benzyloxy)-3-((4-(trifluoromethyl)phenyl)sulfonyl)-1,2-dihydronaphthalene (3ag)**

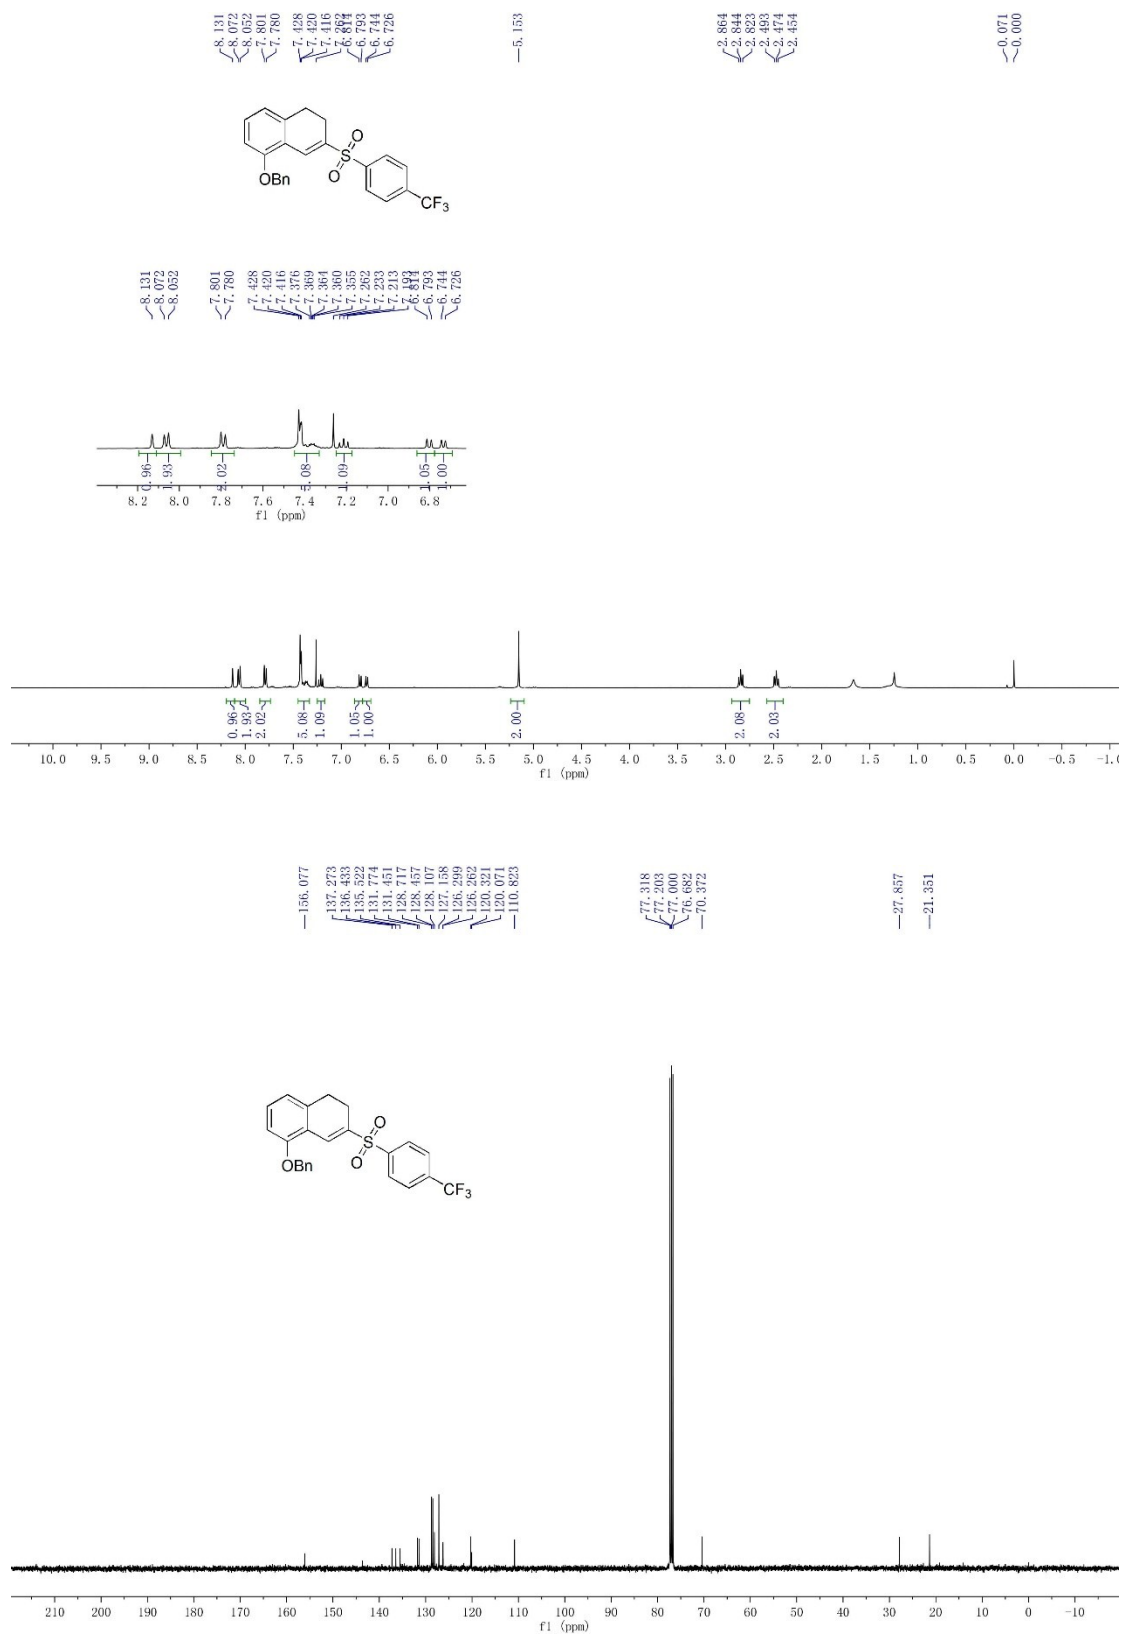

—63.089

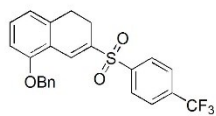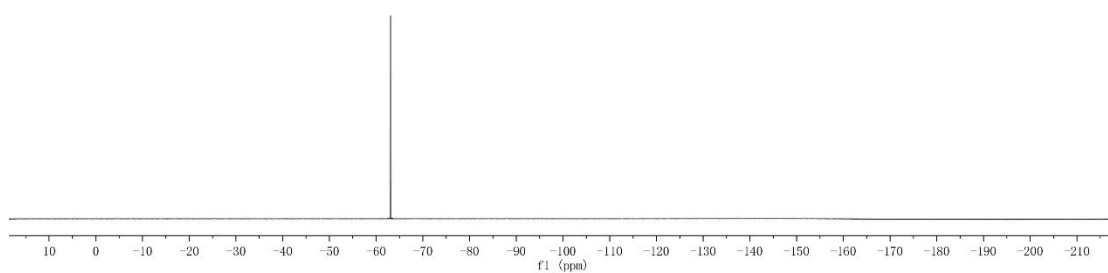

**1-(4-((8-(Benzyloxy)-3,4-dihydronaphthalen-2-yl)sulfonyl)phenyl)ethanone (3ah)**

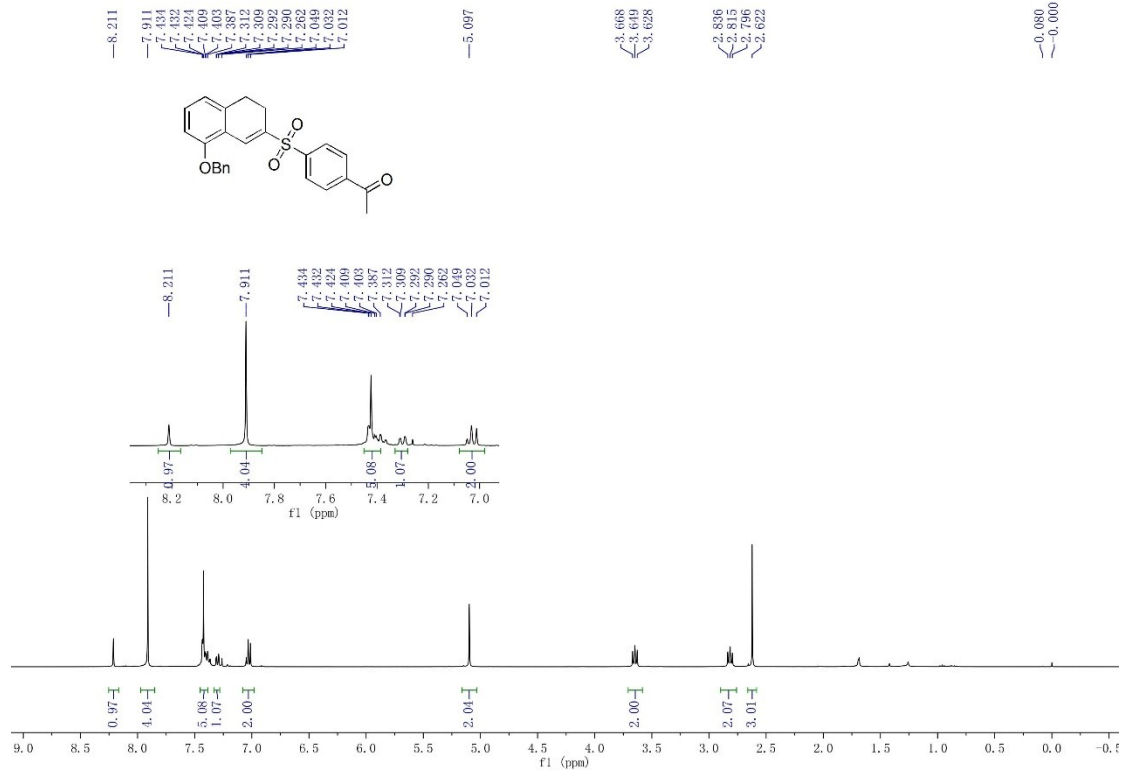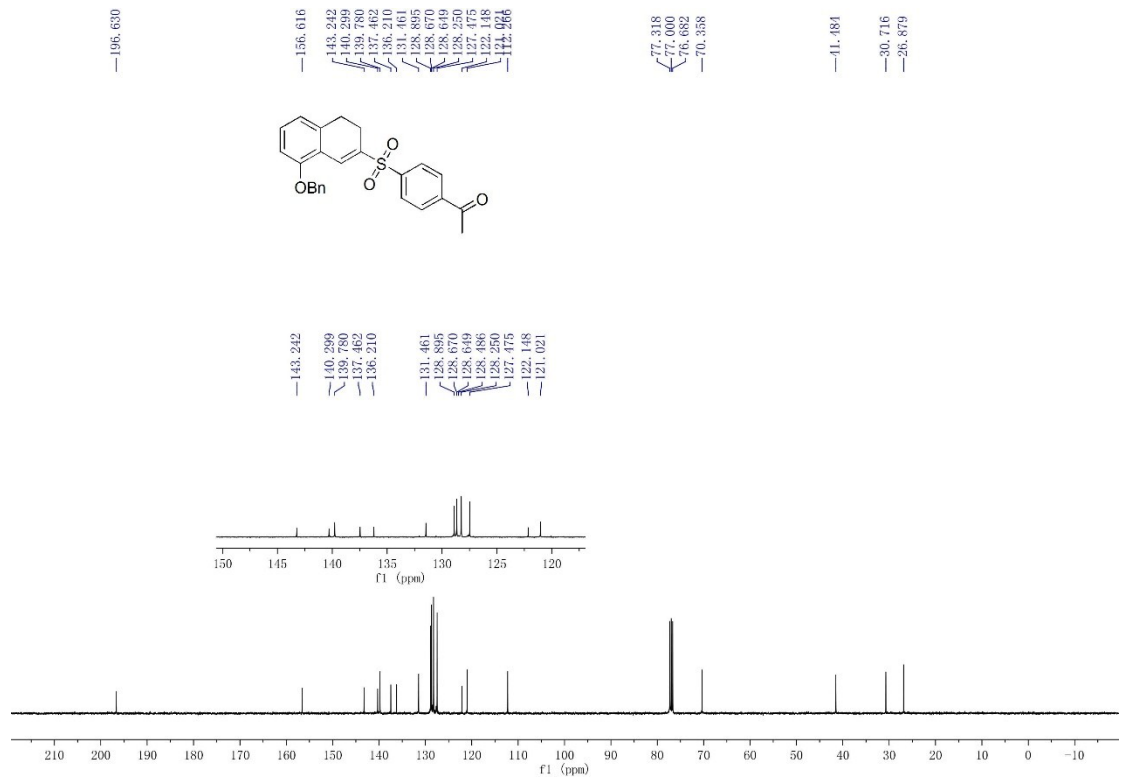

### 5-(Benzyloxy)-3-((4-nitrophenyl)sulfonyl)-1,2-dihydronaphthalene (3ai)

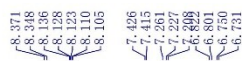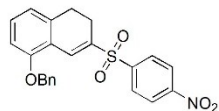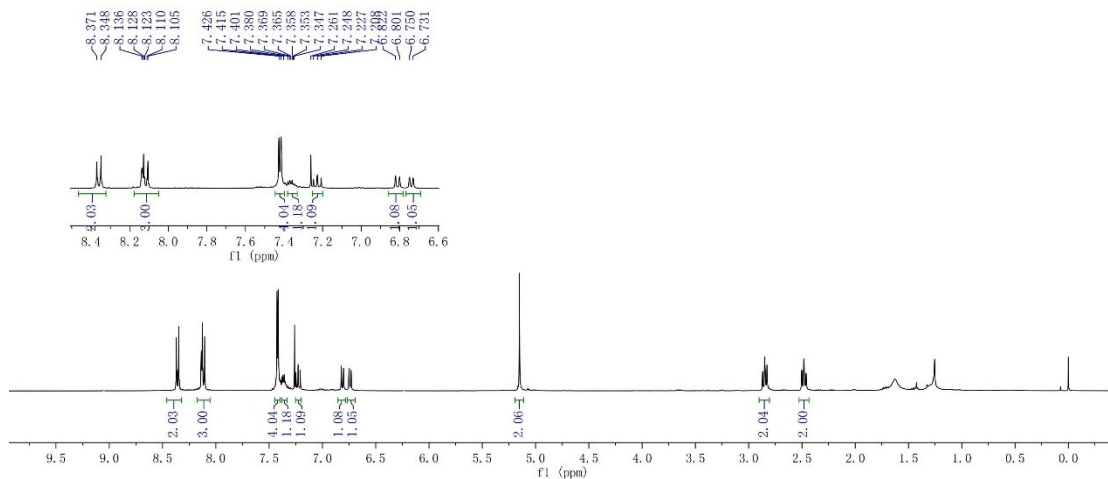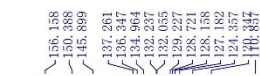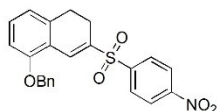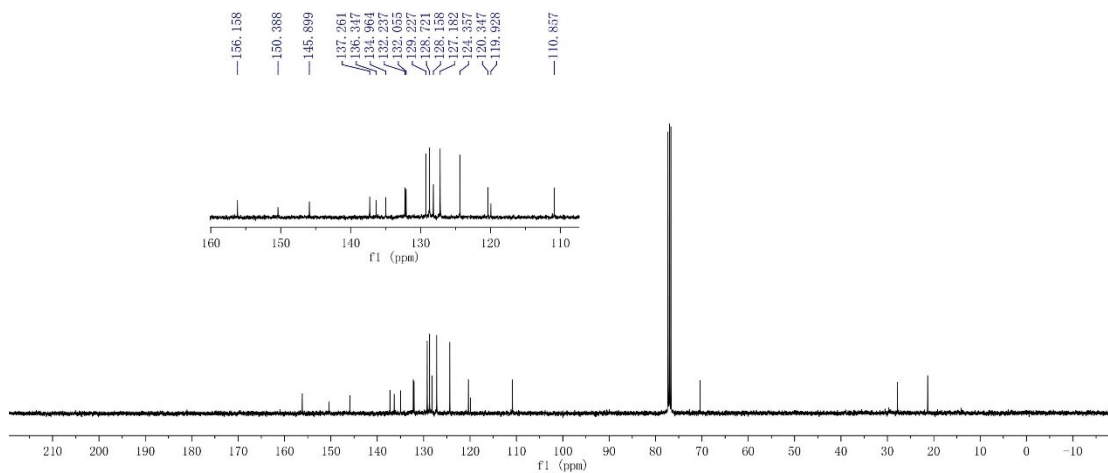

**5-(Benzyloxy)-3-(m-tolylsulfonyl)-1,2-dihydronaphthalene (3aj)**

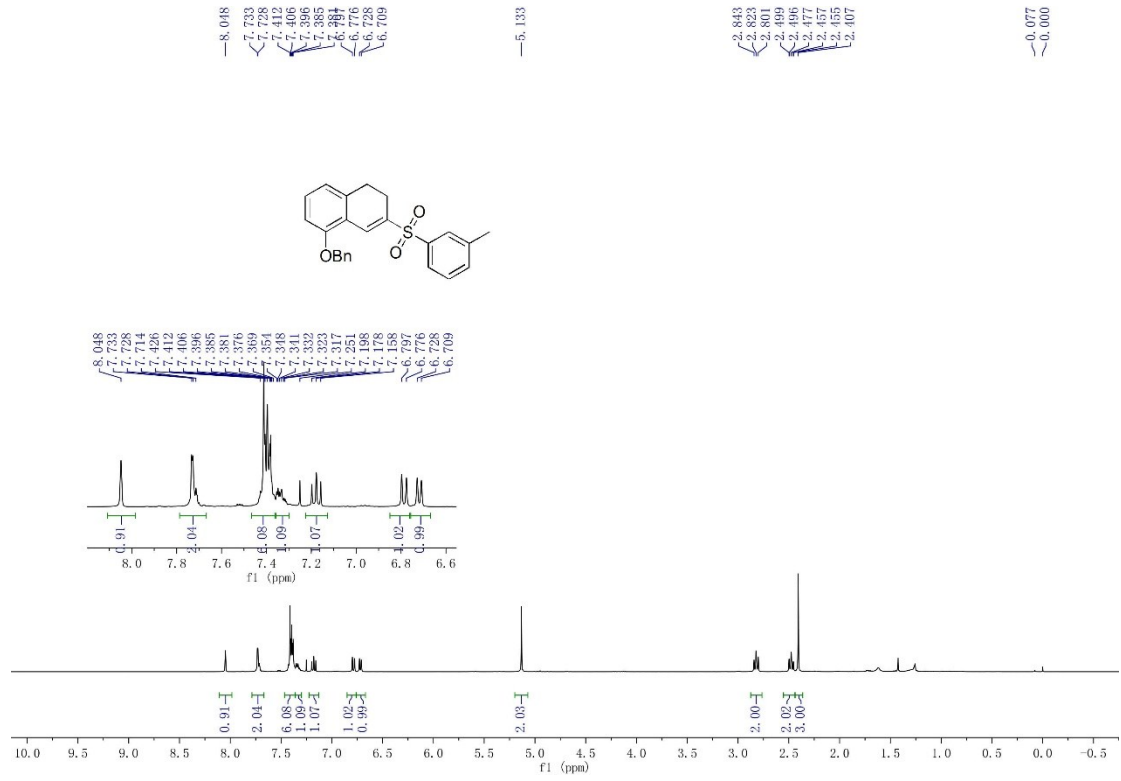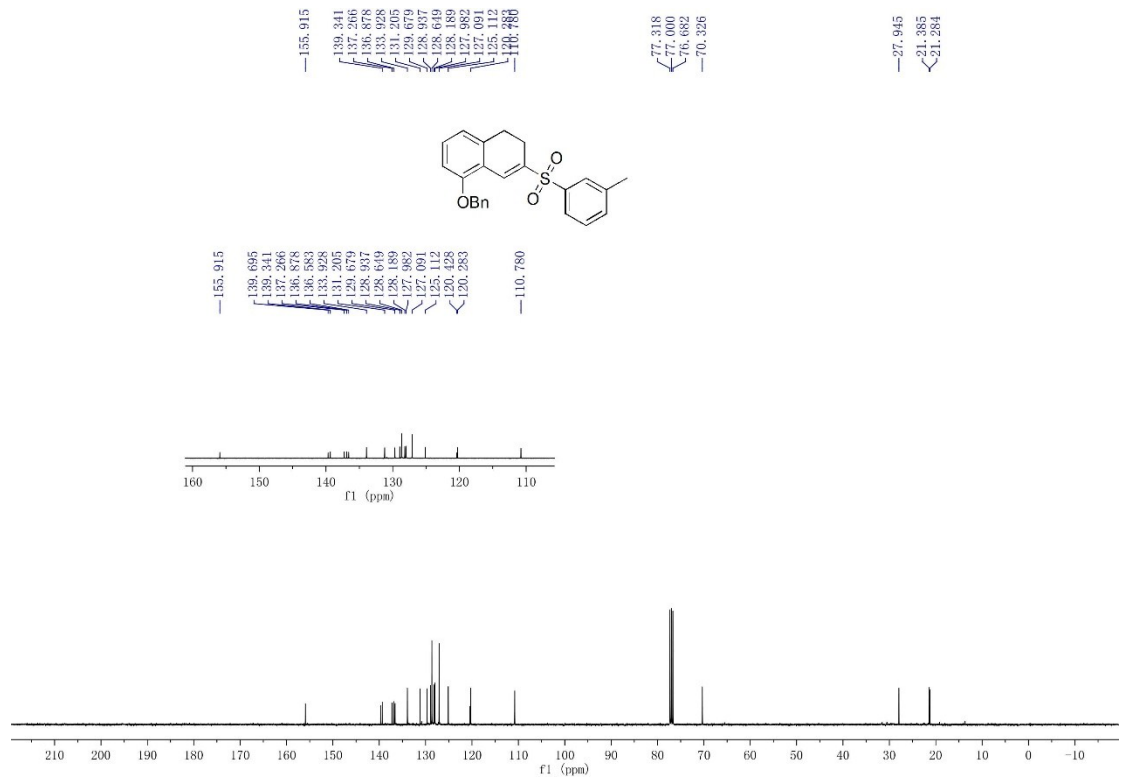

**5-(Benzyloxy)-3-(o-tolylsulfonyl)-1,2-dihydronaphthalene (3ak)**

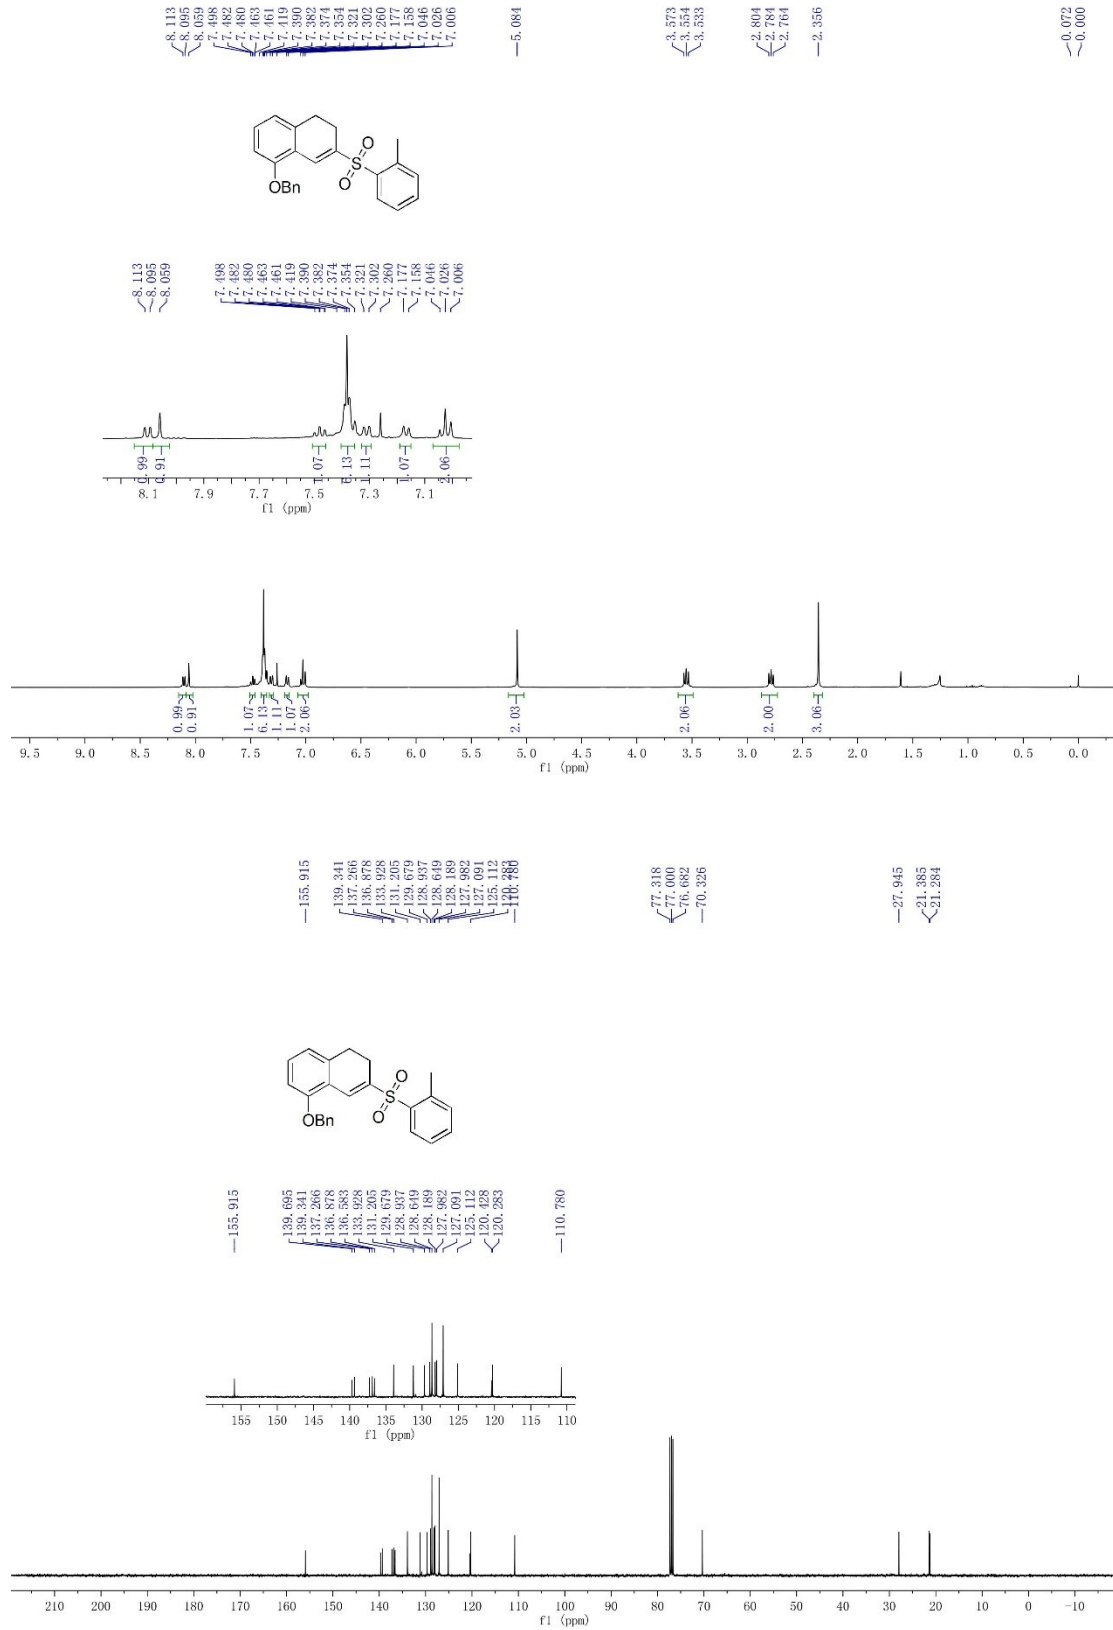



2-((8-(Benzyloxy)-3,4-dihydronaphthalen-2-yl)sulfonyl)benzonitrile (3a)

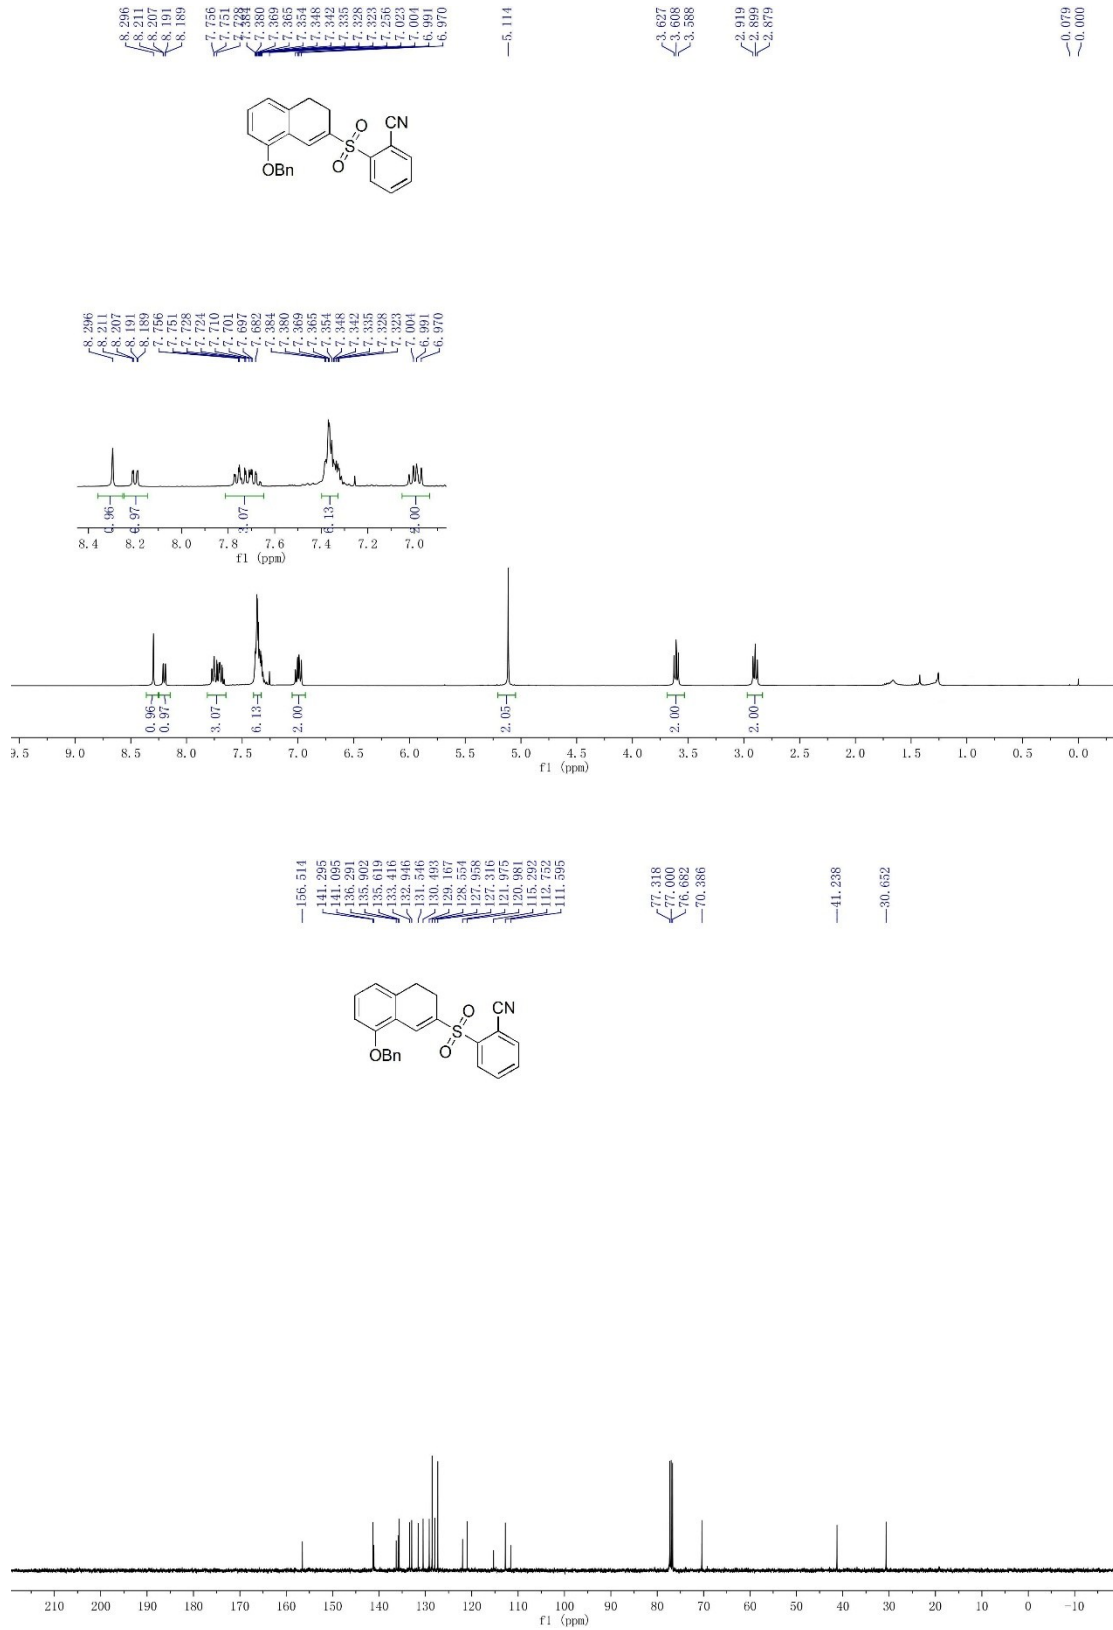

**5-(Benzyloxy)-3-((2-nitrophenyl)sulfonyl)-1,2-dihydronaphthalene (3am)**

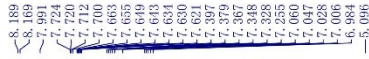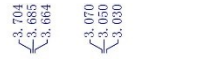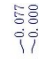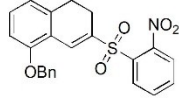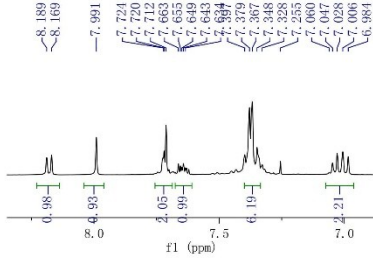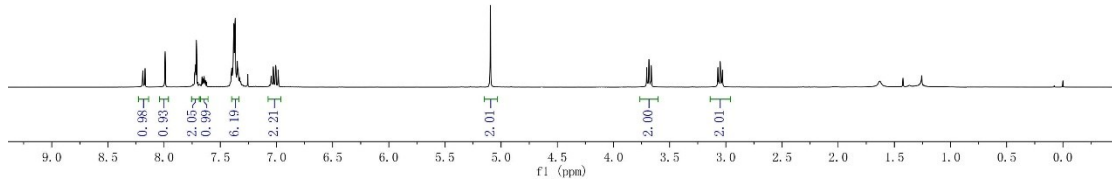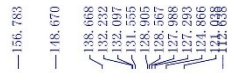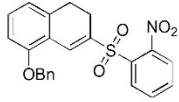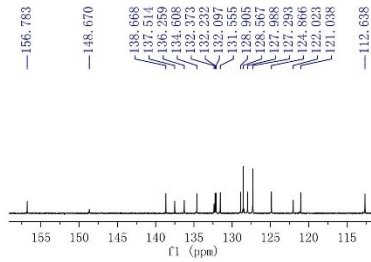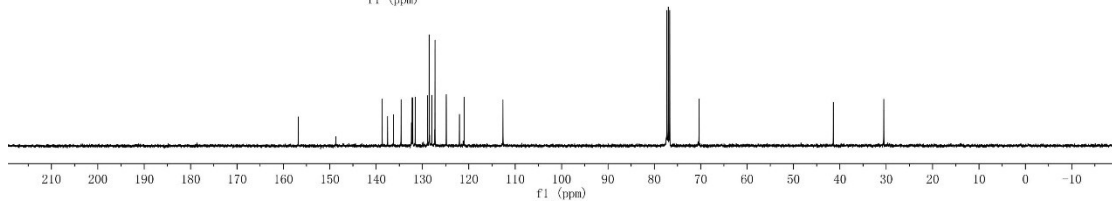

### 5-(Benzyloxy)-3-(mesitylsulfonyl)-1,2-dihydronaphthalene (3an)

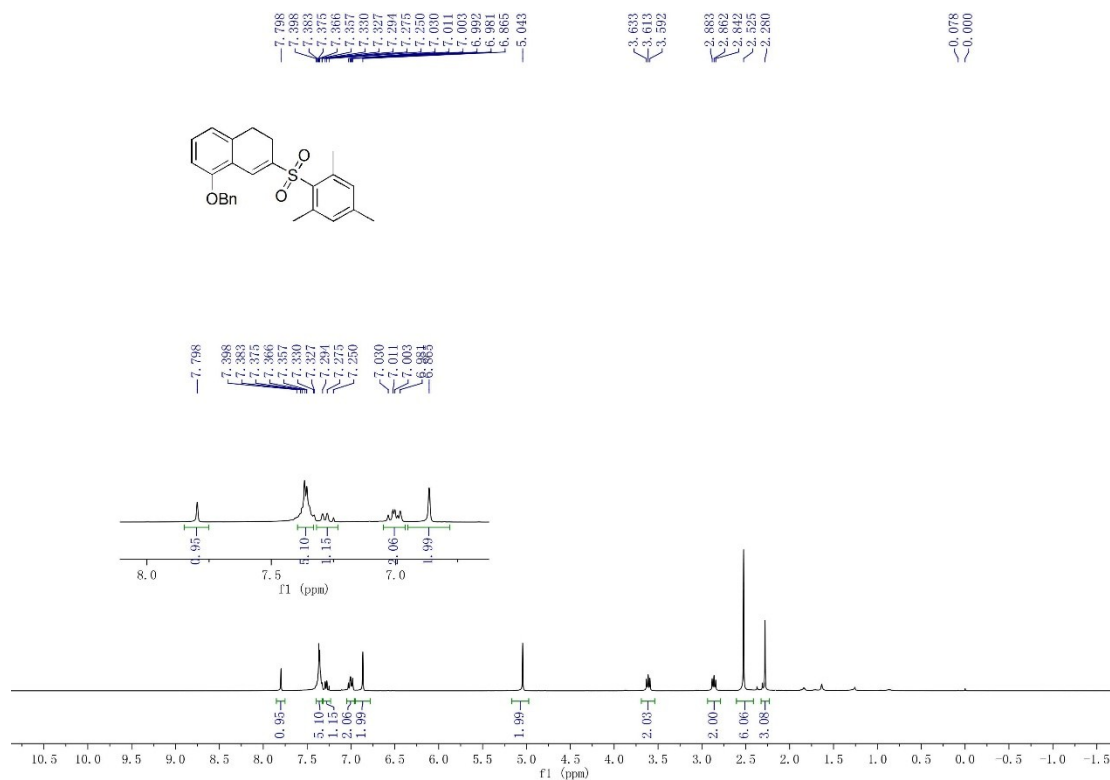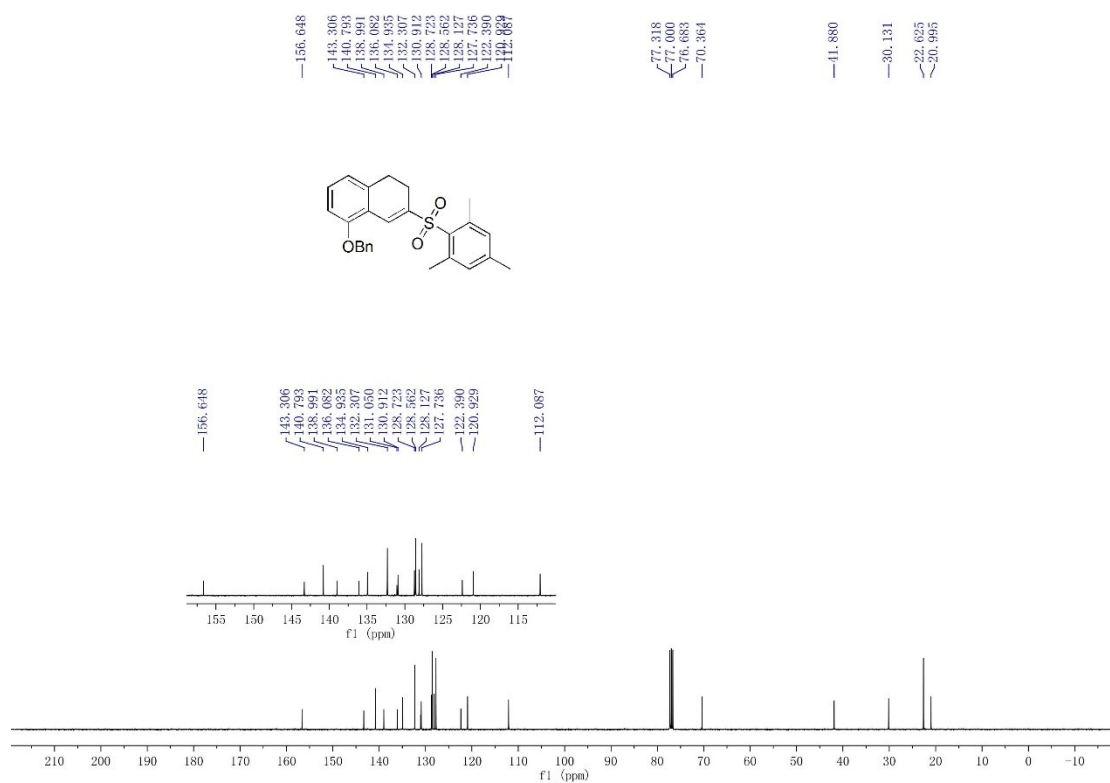

**6-((8-(Benzyloxy)-3,4-dihydronaphthalen-2-yl)sulfonyl)-2,3-dihydrobenzofuran (3ao)**

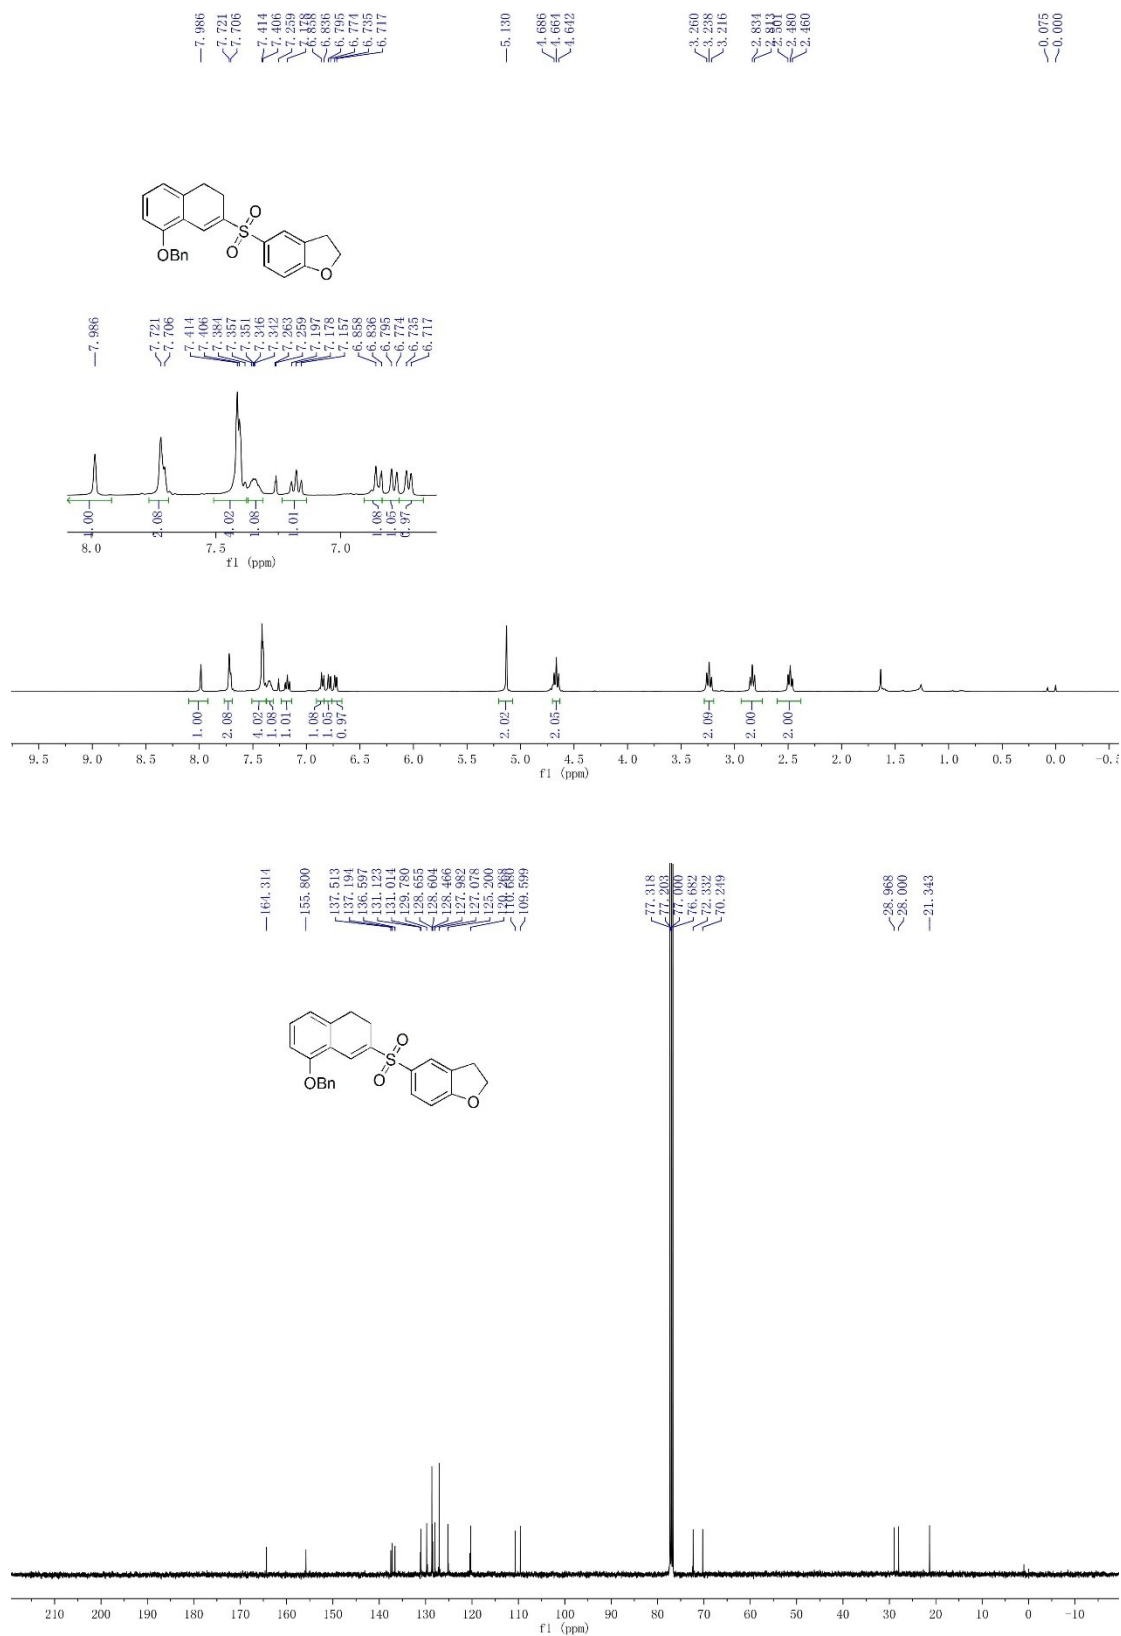



**5-(Benzyloxy)-3-(phenylsulfonyl)-1,2-dihydronaphthalene (3aq)**

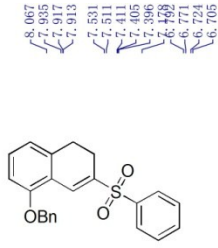

8.067, 7.935, 7.917, 7.913, 7.872, 7.569, 7.531, 7.511, 7.493, 7.411, 7.396, 7.405, 7.396, 7.348, 7.341, 6.771, 6.724, 6.705, -5.130, -2.835, -2.815, -2.794, -2.490, -2.469, -2.449, -2.447, -0.082, -0.000

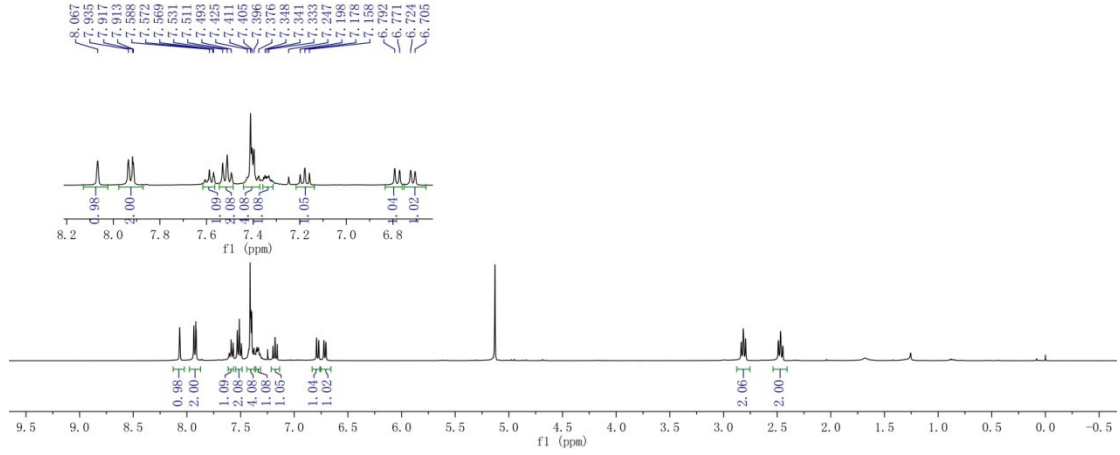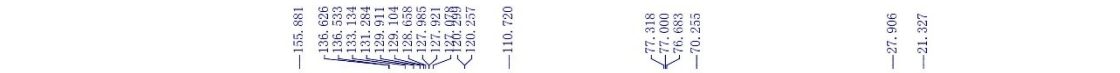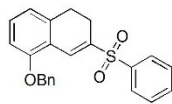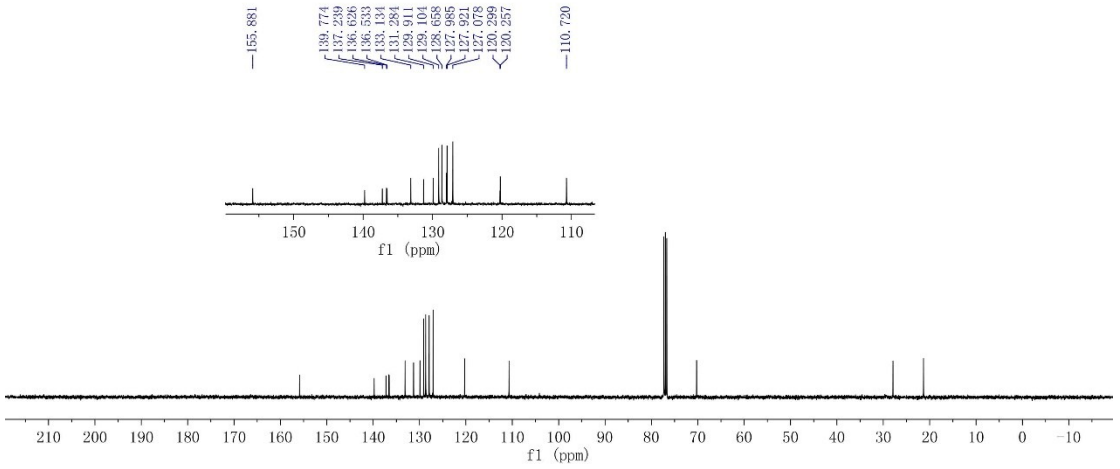



**S-p-tolyl 4-methylbenzenesulfonothioate (4)**

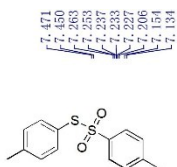

7.471  
7.450  
7.263  
7.253  
7.237  
7.227  
7.206  
7.154  
7.134

2.426  
2.381

0.070  
0.000

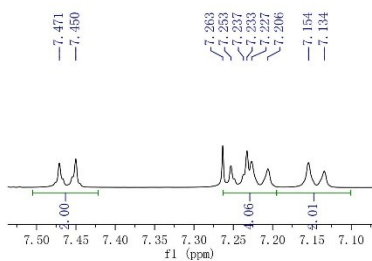

7.471  
7.450  
7.263  
7.253  
7.237  
7.227  
7.206  
7.154  
7.134

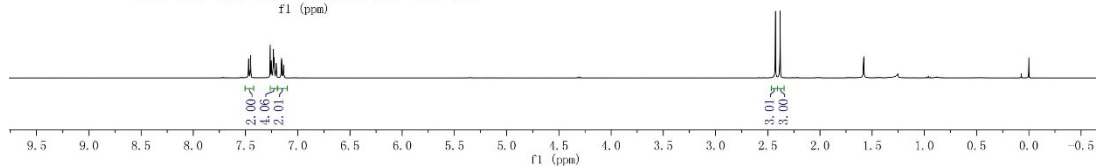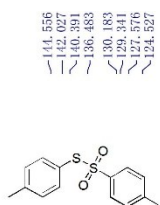

144.556  
142.027  
140.391  
136.483  
130.183  
128.341  
127.576  
124.527

77.317  
77.000  
76.682

21.057  
21.177

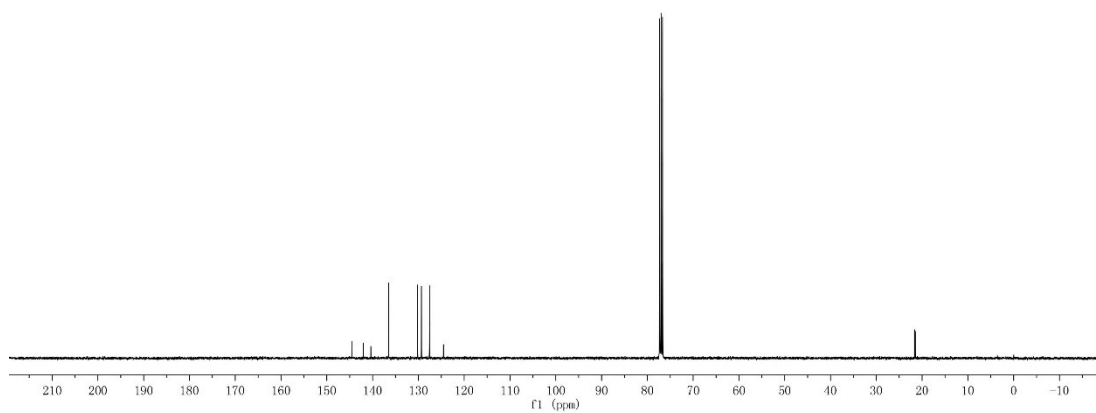

Supplement: c8ob03045f1.pdf [file c8ob03045f1.pdf]
